# Supplementary material for: An artificial neural network to predict reactivity ratios in radical copolymerization
Source: Royal Society of Chemistry journal article supplement (doi:10.1039/d3py00246b), 2023-01-01
Supplement: d3py00246b1.pdf [file d3py00246b1.pdf]

## Supporting Information

### An artificial neural network to predict reactivity ratios in radical copolymerization

*Kiarash Farajzadehahary, Xabier Telleria-Allika, José M. Asua and Nicholas Ballard\**

The neural network architecture and hyperparameters were selected on the basis of the results of a search of the hyperparameter space using k-fold cross validation (k=5). In **Table S1** the results of varying the network architecture are shown. It can be seen that with the exception of relatively small networks (few layers with small number of neurons per layer) and deep networks (networks with 3 or more layers) the performance was relatively similar (**Table S1**). With respect to the other hyperparameters of the model, the optimizer and batch size had virtually no influence on the final result but significant improvement was observed when using ReLU activation functions as compared to sigmoid function (**Table S2**). Variation of the learning rate showed an optimum for value of 0.001 (**Table S3**) and therefore this was the value used for the results in the main paper. A comprehensive grid search with simultaneous variation of multiple parameters (**Table S4**) determined the optimum architecture to be a network with two hidden layers of 80 and 40 neurons, ReLU activation functions, batchsize of 16 with the Adam optimizer.

**Table S1** Results of parameter search for different network architectures. The numbers in brackets describe the number of neurons in each layer of the network. Batch size = 16. ReLU activation. Epochs = 40. Optimizer =Adam. Learning rate = 0.001. Note that the error corresponds to the error in the natural logarithm (model output).

| Rank | Layers            | neg MAE | Rank | Layers           | neg MAE |
|------|-------------------|---------|------|------------------|---------|
| 1    | [100, 50]         | -0.627  | 22   | [32, 16, 32, 16] | -0.659  |
| 2    | [100, 50, 20]     | -0.627  | 23   | [20, 50, 100]    | -0.659  |
| 3    | [100, 100]        | -0.628  | 24   | [20, 30]         | -0.660  |
| 4    | [80, 40]          | -0.629  | 25   | [16, 32, 64]     | -0.663  |
| 5    | [128]             | -0.629  | 26   | [20, 40]         | -0.668  |
| 6    | [64, 32]          | -0.630  | 27   | [20, 20, 20]     | -0.669  |
| 7    | [100, 50, 25, 10] | -0.630  | 28   | [20, 20]         | -0.672  |
| 8    | [50, 50]          | -0.635  | 29   | [20, 10, 10, 20] | -0.675  |

|           |                  |        |           |                    |        |
|-----------|------------------|--------|-----------|--------------------|--------|
| <b>9</b>  | [64, 64]         | -0.636 | <b>30</b> | [20, 10]           | -0.676 |
| <b>10</b> | [50, 25, 10]     | -0.637 | <b>31</b> | [16]               | -0.677 |
| <b>11</b> | [32, 64]         | -0.641 | <b>32</b> | [10, 10]           | -0.681 |
| <b>12</b> | [40, 20]         | -0.642 | <b>33</b> | [10, 25, 50]       | -0.683 |
| <b>13</b> | [50, 100]        | -0.642 | <b>34</b> | [10, 20, 30]       | -0.685 |
| <b>14</b> | [40, 80]         | -0.642 | <b>35</b> | [64, 32, 16, 8, 4] | -0.688 |
| <b>15</b> | [64, 32, 16]     | -0.642 | <b>36</b> | [10, 20]           | -0.697 |
| <b>16</b> | [32, 64, 64, 32] | -0.645 | <b>37</b> | [10, 10, 10]       | -0.704 |
| <b>17</b> | [64]             | -0.647 | <b>38</b> | [10, 5]            | -0.705 |
| <b>18</b> | [30, 20]         | -0.648 | <b>39</b> | [20, 10, 5]        | -0.705 |
| <b>19</b> | [32, 32]         | -0.649 | <b>40</b> | [5, 10, 20]        | -0.711 |
| <b>20</b> | [30, 20, 10]     | -0.652 | <b>41</b> | [5, 5]             | -0.720 |
| <b>21</b> | [32]             | -0.653 | <b>42</b> | [5, 10]            | -0.727 |

**Table S2** Results of parameter search for varying optimizer, batch size and activation function. Model architecture [80, 40]. Epochs = 50. Learning rate = 0.001. Note that the error corresponds to the error in the natural logarithm (model output).

| Rank     | Optimizer | Activation | Batch size | neg MAE |
|----------|-----------|------------|------------|---------|
| <b>1</b> | adam      | relu       | 32         | -0.634  |
| <b>2</b> | adam      | relu       | 16         | -0.637  |
| <b>3</b> | rmsprop   | relu       | 16         | -0.643  |
| <b>4</b> | rmsprop   | relu       | 32         | -0.646  |
| <b>5</b> | adam      | sigmoid    | 16         | -0.676  |
| <b>6</b> | adam      | sigmoid    | 32         | -0.717  |
| <b>7</b> | rmsprop   | sigmoid    | 32         | -0.721  |
| <b>8</b> | rmsprop   | sigmoid    | 16         | -0.721  |

**Table S3** Results of parameter search of learning rate. Model architecture [80, 40]. Epochs = 50. Batch size = 16. ReLU activation. Optimizer = Adam. Note that the error corresponds to the error in the natural logarithm (model output).

| Rank     | Learning rate | neg MAE |
|----------|---------------|---------|
| <b>1</b> | 0.001         | -0.635  |
| <b>2</b> | 0.0005        | -0.648  |
| <b>3</b> | 0.005         | -0.653  |
| <b>4</b> | 0.0001        | -0.654  |
| <b>5</b> | 0.01          | -0.660  |
| <b>6</b> | 0.05          | -0.826  |
| <b>7</b> | 0.1           | -1.055  |
| <b>8</b> | 0.5           | -1.067  |

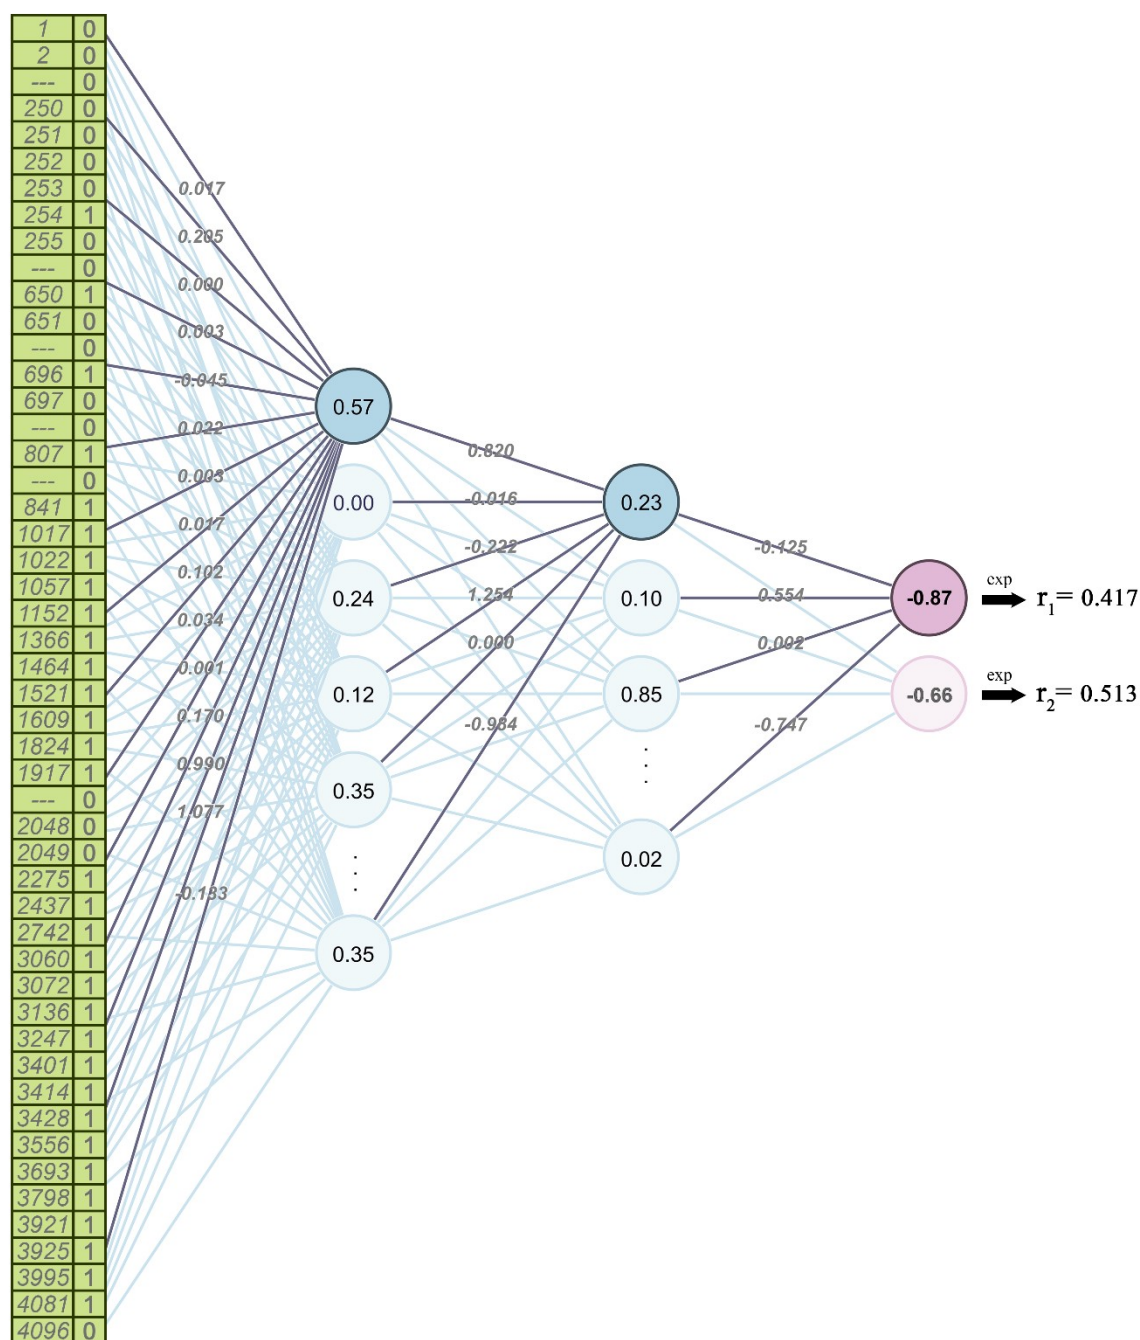

**Figure S1.** A computed example for the case of determining the reactivity ratios for methyl methacrylate and styrene. The input (values in yellow) corresponds to the Morgan fingerprint of the two monomers (the first 2048 bits correspond to substructures in MMA and the second 2048 correspond to styrene). The Morgan fingerprint of each monomer is a vector of zeros and ones where a value of 1 shows the presence of a certain substructure. **Figure 1** in the main manuscript shows which bits correspond to which substructures. The neural network is computed as shown in **Figure 3** to calculate values in the hidden layers. The final output of the neural network is the natural logarithm of the estimated value of  $r_1$  and  $r_2$ .

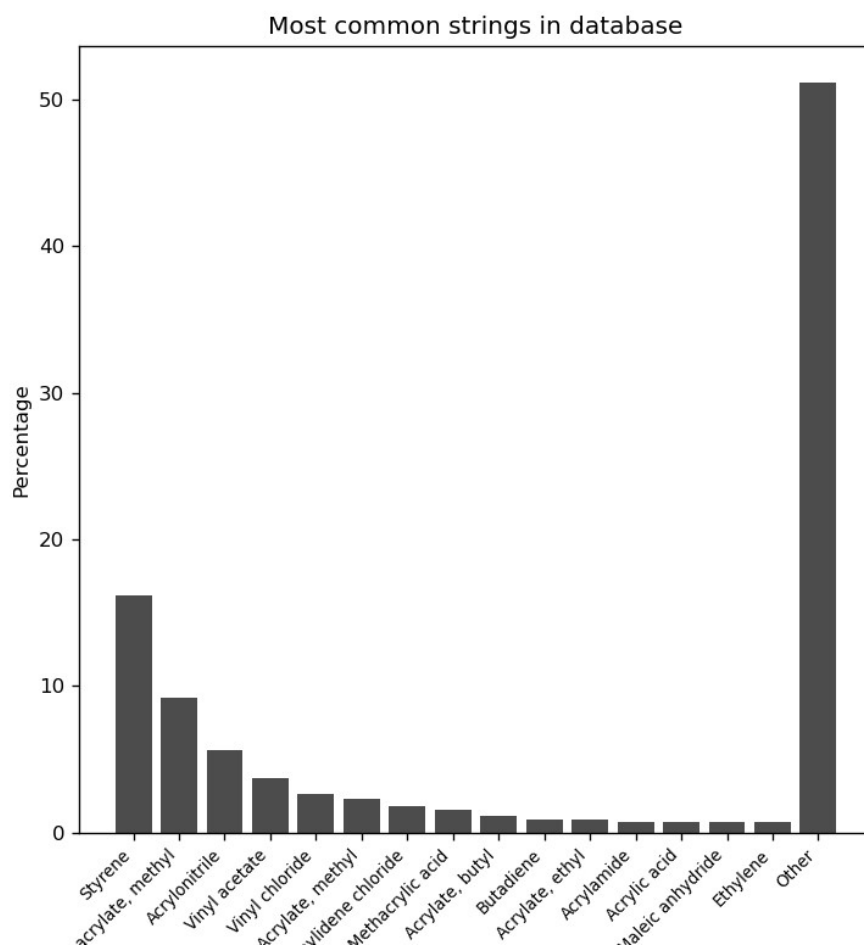

**Figure S2.** Distribution of most common monomers in *Polymer Handbook*.

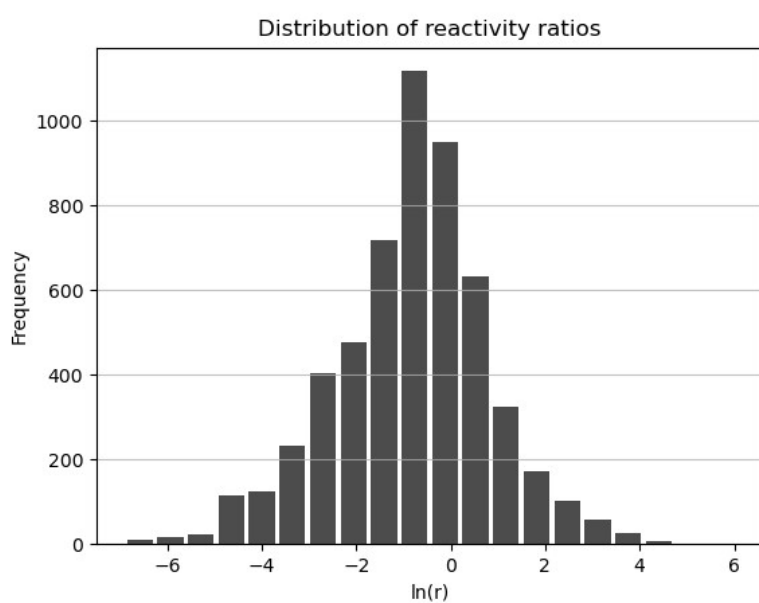

**Figure S3.** Distribution of reactivity ratios for entries in the *Polymer Handbook*.

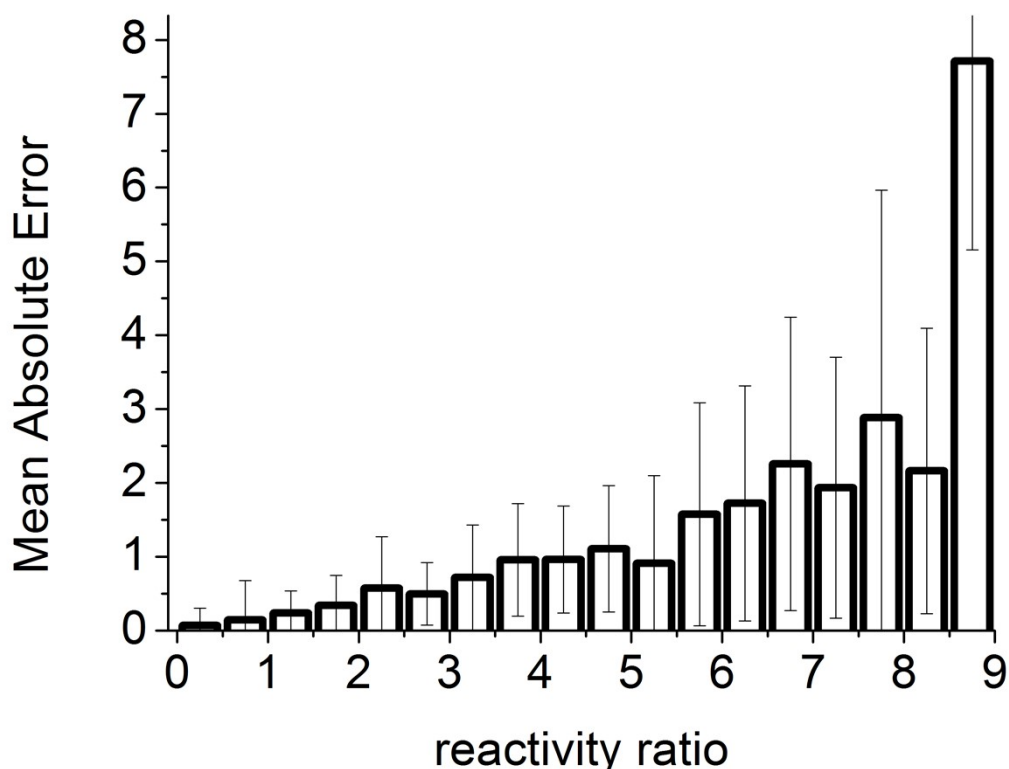

**Figure S4.** Mean absolute error of predictions of  $r_1$  and  $r_2$  relative to experimental value for different experimental values of the reactivity ratio. The error bars show the standard deviation of the error.

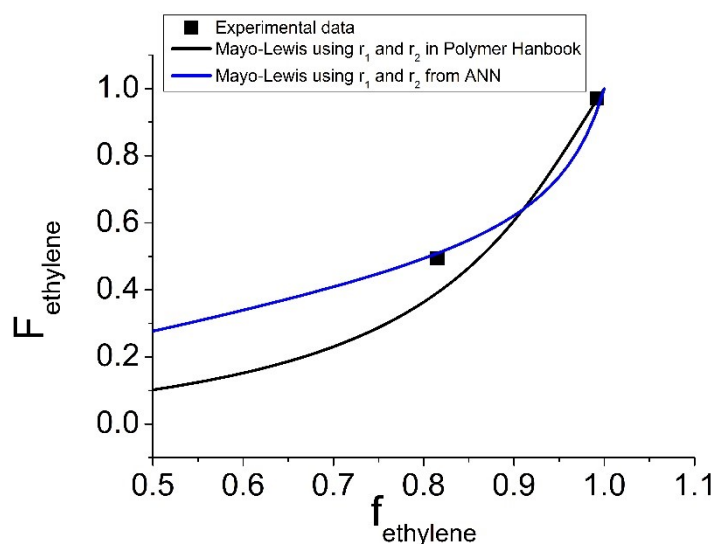

**Figure S5.** Mayo-Lewis plot showing the experimental data of Brown and Ham (*J Polym Sci A* 1964, 2, 3623–3632) for the copolymerization of ethylene with diethyl maleate. The lines represent the values from the Mayo-Lewis equation using  $r_1$  and  $r_2$  values from the *Polymer Handbook* (black line) or from the predictions of the artificial neural network (blue line).

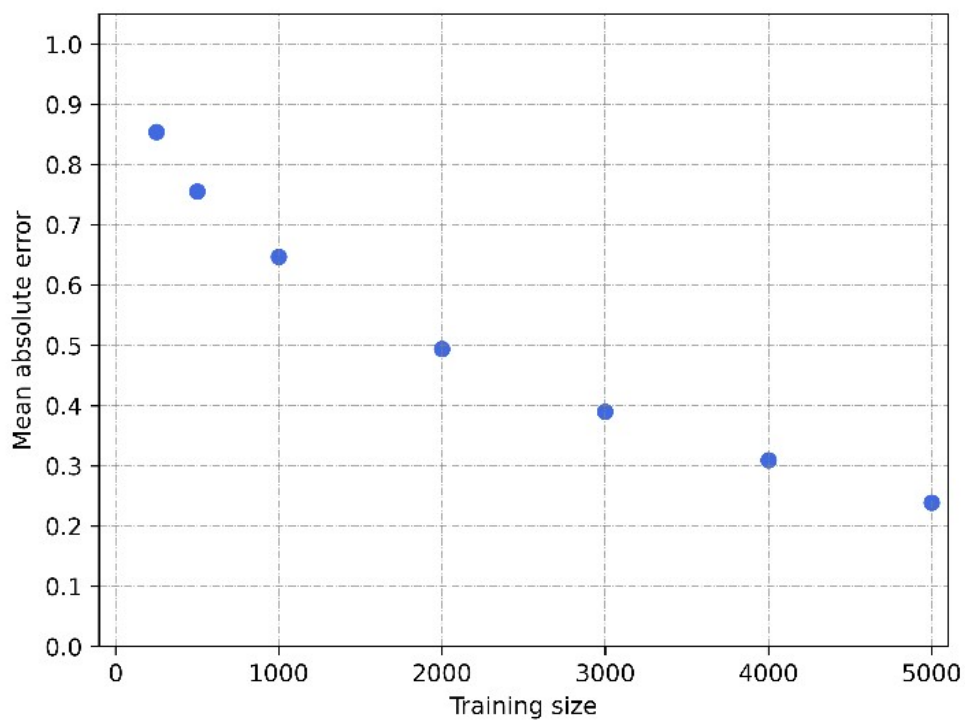

**Figure S6.** Mean absolute error of the entire dataset as a function of the size of the training dataset.

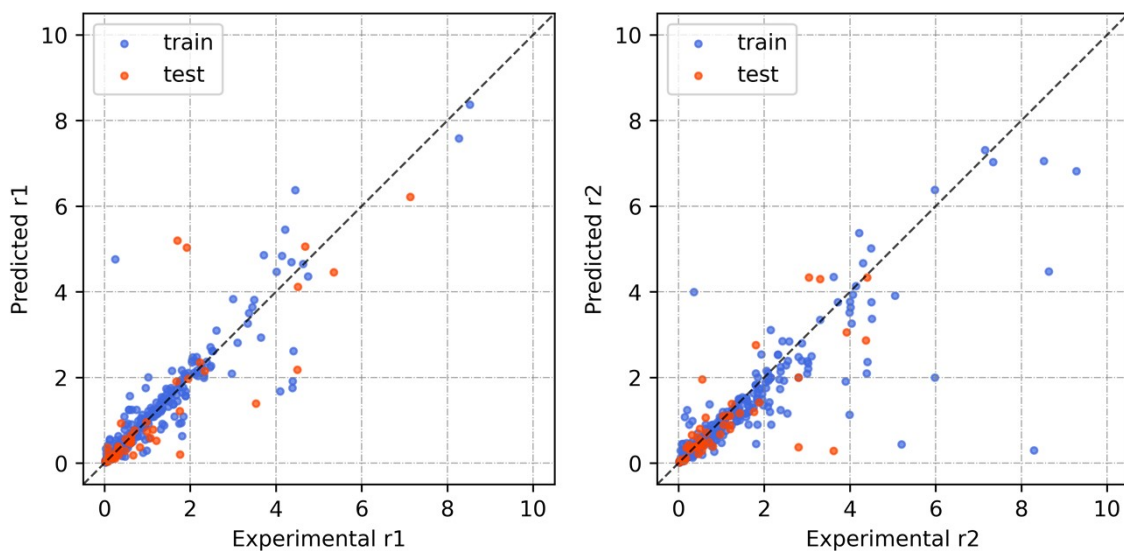

**Figure S7.** Parity plots showing the predicted and experimentally determined reactivity ratios for 450 entries of the training dataset and 50 entries of the test dataset. The dataset was composed only of those entries for which experimental reactivity ratios were calculated by the Kelen-Tudos method.

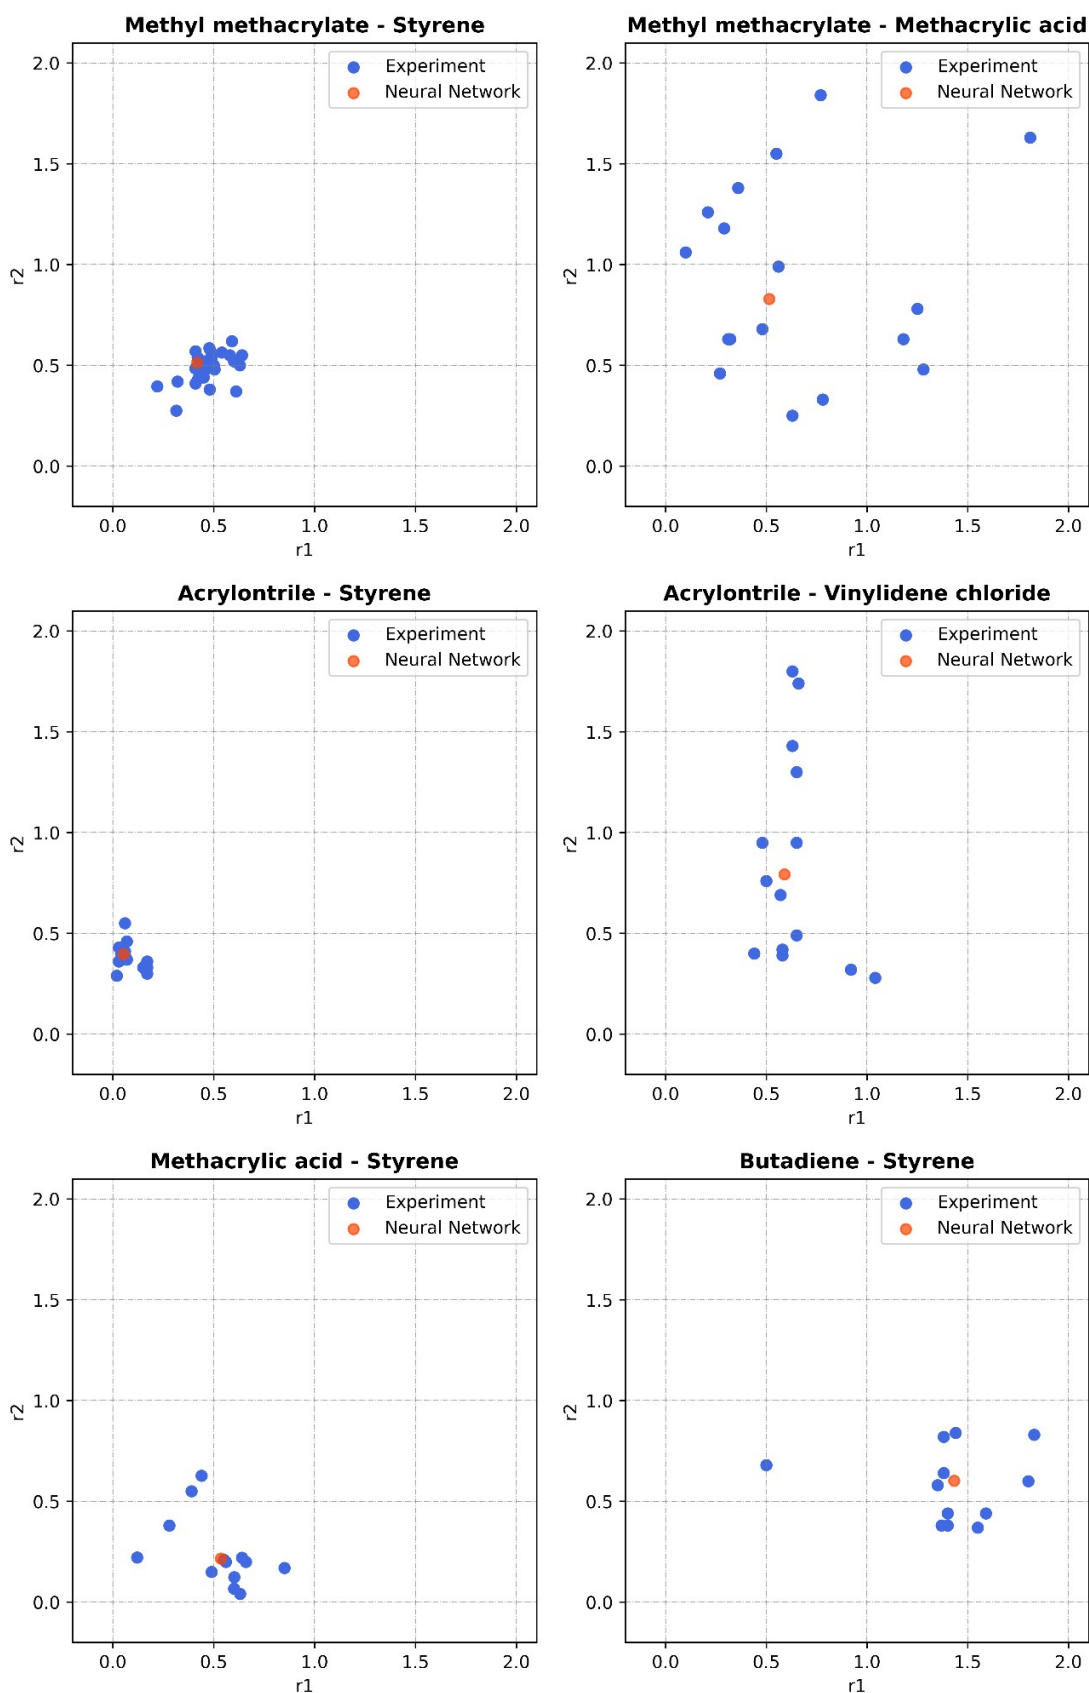

**Figure S8.** Comparison of results of neural network with experimentally determined reactivity ratios for the most common entries in the *Polymer Handbook*. Note that the value predicted by the neural network is taken from the average of two predictions with the monomer order reversed.

**Table S4** Results of grid search of hyperparameters. Note that the error corresponds to the error in the natural logarithm (model output)

| param_layers          | Batch size | Optimizer | Activations | Test MAE avg | Test MAE std | MAE rank | Test avg MSE | Test MSE std | MSE rank | Test avg r-sqr | Test r-sq std | r-sq rank | fit time avg | fit time std | ranks avg | overall rank |
|-----------------------|------------|-----------|-------------|--------------|--------------|----------|--------------|--------------|----------|----------------|---------------|-----------|--------------|--------------|-----------|--------------|
| [80, 40]              | 16         | adam      | relu        | 0.5715       | 0.01142      | 4        | 0.8491       | 0.02058      | 2        | 0.6085         | 0.02371       | 2         | 13.3         | 0.16         | 2.67      | 1            |
| [100, 100]            | 8          | adam      | relu        | 0.5714       | 0.01171      | 3        | 0.8509       | 0.02847      | 6        | 0.6068         | 0.02972       | 6         | 27.5         | 0.64         | 5         | 2            |
| [100, 60, 40]         | 8          | Nadam     | relu        | 0.5697       | 0.01461      | 1        | 0.8513       | 0.02969      | 7        | 0.6063         | 0.0305        | 8         | 31.44        | 0.37         | 5.33      | 3            |
| [100]                 | 16         | adam      | relu        | 0.5734       | 0.01637      | 14       | 0.848        | 0.03321      | 1        | 0.6092         | 0.03223       | 1         | 13.94        | 0.22         | 5.33      | 4            |
| [100, 100]            | 16         | Nadam     | relu        | 0.5712       | 0.01241      | 2        | 0.8517       | 0.02976      | 9        | 0.6059         | 0.03051       | 10        | 16.87        | 0.12         | 7         | 5            |
| [100, 100]            | 8          | Nadam     | relu        | 0.5727       | 0.01209      | 9        | 0.8519       | 0.02633      | 10       | 0.6059         | 0.02768       | 9         | 30.93        | 0.27         | 9.33      | 6            |
| [80, 80, 40, 40]      | 8          | Nadam     | relu        | 0.5718       | 0.01374      | 5        | 0.8526       | 0.03182      | 12       | 0.6052         | 0.02928       | 12        | 29.92        | 0.45         | 9.67      | 7            |
| [100, 100]            | 32         | Nadam     | relu        | 0.5734       | 0.0121       | 13       | 0.8525       | 0.02699      | 11       | 0.6055         | 0.02405       | 11        | 10.22        | 0.41         | 11.67     | 8            |
| [100]                 | 8          | Nadam     | relu        | 0.5754       | 0.0116       | 31       | 0.8505       | 0.02878      | 3        | 0.6076         | 0.02545       | 3         | 29.08        | 0.39         | 12.33     | 9            |
| [100, 100]            | 32         | adam      | relu        | 0.5726       | 0.01108      | 8        | 0.8544       | 0.02804      | 17       | 0.6036         | 0.02875       | 17        | 8.97         | 0.17         | 14        | 10           |
| [100, 60, 40]         | 16         | adam      | relu        | 0.5738       | 0.01098      | 17       | 0.8529       | 0.02917      | 13       | 0.6049         | 0.02921       | 13        | 14.92        | 0.13         | 14.33     | 11           |
| [80, 80, 80, 80]      | 16         | adam      | relu        | 0.5723       | 0.01369      | 6        | 0.855        | 0.03019      | 21       | 0.6027         | 0.03119       | 20        | 14.21        | 0.2          | 15.67     | 12           |
| [100, 80, 60, 40, 20] | 16         | Nadam     | relu        | 0.5724       | 0.01403      | 7        | 0.8549       | 0.03281      | 20       | 0.6027         | 0.03612       | 21        | 18.34        | 0.13         | 16        | 13           |
| [80, 40]              | 8          | Nadam     | relu        | 0.5739       | 0.01551      | 18       | 0.8536       | 0.03151      | 15       | 0.6039         | 0.03192       | 15        | 27.89        | 0.31         | 16        | 14           |
| [100]                 | 32         | Nadam     | relu        | 0.5756       | 0.00766      | 34       | 0.8515       | 0.02477      | 8        | 0.6063         | 0.02674       | 7         | 9.3          | 0.32         | 16.33     | 15           |
| [100, 100]            | 16         | adam      | relu        | 0.5744       | 0.01575      | 20       | 0.8546       | 0.02858      | 18       | 0.6031         | 0.03187       | 19        | 14.82        | 0.28         | 19        | 16           |
| [100, 60]             | 32         | Nadam     | relu        | 0.5732       | 0.01634      | 11       | 0.856        | 0.03319      | 23       | 0.6019         | 0.03156       | 24        | 9.8          | 0.17         | 19.33     | 17           |
| [100]                 | 16         | Nadam     | relu        | 0.578        | 0.01482      | 51       | 0.8506       | 0.02887      | 4        | 0.6073         | 0.02769       | 4         | 15.58        | 0.22         | 19.67     | 18           |
| [80, 80]              | 16         | Nadam     | relu        | 0.5731       | 0.01307      | 10       | 0.8564       | 0.02891      | 26       | 0.6016         | 0.03014       | 26        | 15.35        | 0.39         | 20.67     | 19           |
| [80, 80, 80, 80]      | 8          | Nadam     | relu        | 0.5735       | 0.01429      | 15       | 0.8563       | 0.03109      | 24       | 0.602          | 0.02714       | 23        | 30.51        | 0.13         | 20.67     | 20           |
| [60, 60]              | 16         | adam      | relu        | 0.5757       | 0.0156       | 36       | 0.8536       | 0.03104      | 14       | 0.6043         | 0.02848       | 14        | 12.53        | 0.2          | 21.33     | 21           |
| [100, 60]             | 16         | Nadam     | relu        | 0.5746       | 0.01174      | 21       | 0.8559       | 0.02615      | 22       | 0.602          | 0.02829       | 22        | 16.36        | 0.28         | 21.67     | 22           |
| [80]                  | 8          | adam      | relu        | 0.5789       | 0.01454      | 62       | 0.8506       | 0.03034      | 5        | 0.6072         | 0.02822       | 5         | 23.85        | 0.19         | 24        | 23           |
| [80, 80]              | 32         | Nadam     | relu        | 0.5733       | 0.01059      | 12       | 0.8575       | 0.02366      | 31       | 0.6008         | 0.02639       | 30        | 8.57         | 0.15         | 24.33     | 24           |
| [80, 80]              | 16         | adam      | relu        | 0.5748       | 0.01632      | 22       | 0.8563       | 0.0318       | 25       | 0.6012         | 0.03619       | 28        | 13.25        | 0.11         | 25        | 25           |
| [100]                 | 8          | adam      | relu        | 0.5782       | 0.01431      | 54       | 0.8538       | 0.03145      | 16       | 0.6038         | 0.0306        | 16        | 26.07        | 0.24         | 28.67     | 26           |



|                       |    |       |      |        |         |    |        |         |    |        |         |    |       |      |       |    |
|-----------------------|----|-------|------|--------|---------|----|--------|---------|----|--------|---------|----|-------|------|-------|----|
| [100, 60, 40]         | 16 | Nadam | relu | 0.5754 | 0.01065 | 30 | 0.8572 | 0.02741 | 29 | 0.6009 | 0.02989 | 29 | 17.26 | 0.26 | 29.33 | 27 |
| [80, 40]              | 32 | adam  | relu | 0.574  | 0.01304 | 19 | 0.8578 | 0.02799 | 36 | 0.6002 | 0.02971 | 35 | 7.61  | 0.09 | 30    | 28 |
| [100, 60]             | 8  | Nadam | relu | 0.5757 | 0.01748 | 35 | 0.8567 | 0.03347 | 28 | 0.6013 | 0.03389 | 27 | 30.9  | 0.67 | 30    | 29 |
| [100]                 | 32 | adam  | relu | 0.5788 | 0.01419 | 59 | 0.8546 | 0.03002 | 19 | 0.6032 | 0.03075 | 18 | 8.35  | 0.15 | 32    | 30 |
| [100, 80, 60, 40, 20] | 32 | Nadam | relu | 0.5752 | 0.01227 | 27 | 0.8577 | 0.02853 | 34 | 0.6001 | 0.03035 | 36 | 10.83 | 0.14 | 32.33 | 31 |
| [100, 60, 40]         | 32 | Nadam | relu | 0.5753 | 0.01241 | 29 | 0.8577 | 0.02767 | 35 | 0.6003 | 0.02865 | 34 | 10.31 | 0.16 | 32.67 | 32 |
| [100, 60]             | 32 | adam  | relu | 0.5775 | 0.01214 | 47 | 0.8565 | 0.02542 | 27 | 0.6019 | 0.02574 | 25 | 8.76  | 0.18 | 33    | 33 |
| [100, 60, 40]         | 8  | adam  | relu | 0.575  | 0.01365 | 24 | 0.8584 | 0.02692 | 38 | 0.5996 | 0.03038 | 39 | 28.06 | 0.72 | 33.67 | 34 |
| [80, 80]              | 8  | Nadam | relu | 0.5773 | 0.01262 | 43 | 0.8574 | 0.02803 | 30 | 0.6008 | 0.02882 | 31 | 28.19 | 0.51 | 34.67 | 35 |
| [100, 60, 40]         | 32 | adam  | relu | 0.5737 | 0.01478 | 16 | 0.8591 | 0.03188 | 46 | 0.5989 | 0.0336  | 44 | 9.05  | 0.16 | 35.33 | 36 |
| [100, 60]             | 16 | adam  | relu | 0.5774 | 0.01169 | 45 | 0.8577 | 0.02533 | 32 | 0.6007 | 0.02542 | 32 | 14.59 | 0.2  | 36.33 | 37 |
| [80, 40, 60]          | 32 | Nadam | relu | 0.575  | 0.01642 | 25 | 0.8587 | 0.03245 | 42 | 0.5991 | 0.03472 | 43 | 8.9   | 0.06 | 36.67 | 38 |
| [80, 40, 60]          | 8  | adam  | relu | 0.5756 | 0.01647 | 33 | 0.859  | 0.03308 | 43 | 0.5989 | 0.03079 | 45 | 25.63 | 0.24 | 40.33 | 39 |
| [80, 80, 80, 80]      | 16 | Nadam | relu | 0.5752 | 0.0126  | 28 | 0.8594 | 0.02643 | 49 | 0.5987 | 0.02947 | 48 | 16.7  | 0.34 | 41.67 | 40 |
| [60, 60]              | 16 | Nadam | relu | 0.5769 | 0.01783 | 39 | 0.859  | 0.03278 | 44 | 0.5989 | 0.03229 | 46 | 14.37 | 0.08 | 43    | 41 |
| [80]                  | 16 | Nadam | relu | 0.5794 | 0.01208 | 66 | 0.8577 | 0.02606 | 33 | 0.6003 | 0.02789 | 33 | 14.32 | 0.22 | 44    | 42 |
| [100, 60]             | 8  | adam  | relu | 0.5774 | 0.01074 | 44 | 0.8591 | 0.02221 | 47 | 0.5988 | 0.02991 | 47 | 27.08 | 0.71 | 46    | 43 |
| [80, 40]              | 8  | adam  | relu | 0.5786 | 0.01224 | 57 | 0.8586 | 0.02691 | 40 | 0.5992 | 0.03173 | 42 | 24.83 | 0.55 | 46.33 | 44 |
| [80, 80, 40, 40]      | 16 | Nadam | relu | 0.5749 | 0.01276 | 23 | 0.8611 | 0.0285  | 59 | 0.5972 | 0.02797 | 59 | 16.23 | 0.21 | 47    | 45 |
| [80, 80, 80, 80]      | 8  | adam  | relu | 0.5752 | 0.01181 | 26 | 0.8611 | 0.02698 | 58 | 0.5973 | 0.02823 | 58 | 26.73 | 0.42 | 47.33 | 46 |
| [80, 80]              | 32 | adam  | relu | 0.5772 | 0.01494 | 42 | 0.8598 | 0.03097 | 51 | 0.5986 | 0.02925 | 49 | 7.59  | 0.2  | 47.33 | 47 |
| [80, 60, 80, 40]      | 8  | Nadam | relu | 0.577  | 0.01353 | 40 | 0.86   | 0.0301  | 52 | 0.5981 | 0.03284 | 52 | 30.52 | 0.68 | 48    | 48 |
| [80, 80]              | 8  | adam  | relu | 0.5775 | 0.01242 | 46 | 0.8595 | 0.03148 | 50 | 0.5985 | 0.03331 | 50 | 24.61 | 0.27 | 48.67 | 49 |
| [80]                  | 16 | adam  | relu | 0.5804 | 0.01425 | 74 | 0.8581 | 0.02965 | 37 | 0.6001 | 0.02855 | 37 | 12.71 | 0.16 | 49.33 | 50 |
| [100, 80, 60, 40, 20] | 8  | adam  | relu | 0.5755 | 0.01156 | 32 | 0.8615 | 0.02612 | 61 | 0.5969 | 0.02805 | 61 | 29.3  | 0.44 | 51.33 | 51 |
| [80]                  | 8  | Nadam | relu | 0.5811 | 0.00956 | 80 | 0.8584 | 0.02454 | 39 | 0.6001 | 0.02747 | 38 | 27.04 | 0.27 | 52.33 | 52 |
| [80, 80, 40, 40]      | 16 | adam  | relu | 0.578  | 0.01549 | 52 | 0.8601 | 0.02844 | 53 | 0.5981 | 0.03134 | 53 | 13.88 | 0.11 | 52.67 | 53 |
| [80, 60, 80, 40]      | 16 | adam  | relu | 0.5779 | 0.01087 | 50 | 0.8605 | 0.02542 | 56 | 0.5979 | 0.026   | 55 | 14.11 | 0.15 | 53.67 | 54 |
| [80, 60, 80, 40]      | 32 | Nadam | relu | 0.576  | 0.01142 | 38 | 0.8619 | 0.02706 | 63 | 0.5965 | 0.02897 | 63 | 9.47  | 0.33 | 54.67 | 55 |
| [60]                  | 8  | Nadam | relu | 0.5832 | 0.01435 | 91 | 0.859  | 0.03027 | 45 | 0.5992 | 0.03194 | 40 | 25.51 | 0.17 | 58.67 | 56 |
| [80, 40, 60]          | 8  | Nadam | relu | 0.5797 | 0.01446 | 68 | 0.8604 | 0.03273 | 55 | 0.5976 | 0.03396 | 56 | 29.31 | 0.36 | 59.67 | 57 |

|                       |    |       |      |        |         |     |        |         |    |        |         |    |       |      |       |    |
|-----------------------|----|-------|------|--------|---------|-----|--------|---------|----|--------|---------|----|-------|------|-------|----|
| [80, 40]              | 32 | Nadam | relu | 0.5801 | 0.01203 | 71  | 0.8602 | 0.02854 | 54 | 0.598  | 0.03062 | 54 | 8.42  | 0.13 | 59.67 | 58 |
| [80, 40]              | 16 | Nadam | relu | 0.5788 | 0.01369 | 58  | 0.8614 | 0.0299  | 60 | 0.5969 | 0.0309  | 62 | 15.37 | 0.35 | 60    | 59 |
| [60, 60]              | 32 | Nadam | relu | 0.5814 | 0.01705 | 81  | 0.8593 | 0.02866 | 48 | 0.5985 | 0.0308  | 51 | 8.12  | 0.11 | 60    | 60 |
| [60]                  | 8  | adam  | relu | 0.584  | 0.01579 | 98  | 0.8587 | 0.03246 | 41 | 0.5992 | 0.03544 | 41 | 23.07 | 0.33 | 60    | 61 |
| [80, 80, 40, 40]      | 8  | adam  | relu | 0.5757 | 0.01953 | 37  | 0.863  | 0.03458 | 74 | 0.5951 | 0.0359  | 75 | 26.05 | 0.16 | 62    | 62 |
| [100, 80, 60, 40, 20] | 16 | adam  | relu | 0.5783 | 0.00928 | 56  | 0.8621 | 0.0248  | 65 | 0.5963 | 0.02863 | 66 | 15.69 | 0.11 | 62.33 | 63 |
| [80, 60, 80, 40]      | 8  | adam  | relu | 0.5771 | 0.01012 | 41  | 0.8638 | 0.02372 | 79 | 0.5949 | 0.02445 | 78 | 26.01 | 0.1  | 66    | 64 |
| [40, 80]              | 8  | Nadam | relu | 0.5821 | 0.01425 | 84  | 0.861  | 0.02705 | 57 | 0.5974 | 0.02763 | 57 | 23.03 | 0.43 | 66    | 65 |
| [80, 60, 80, 40]      | 16 | Nadam | relu | 0.5777 | 0.01458 | 48  | 0.8633 | 0.03322 | 76 | 0.5951 | 0.03435 | 76 | 16.31 | 0.24 | 66.67 | 66 |
| [100, 80, 60, 40, 20] | 8  | Nadam | relu | 0.5781 | 0.01449 | 53  | 0.863  | 0.03303 | 73 | 0.5953 | 0.03394 | 74 | 33.44 | 0.5  | 66.67 | 67 |
| [80, 40, 60]          | 32 | adam  | relu | 0.579  | 0.01317 | 63  | 0.8624 | 0.03202 | 69 | 0.5958 | 0.0329  | 69 | 7.88  | 0.22 | 67    | 68 |
| [60, 40, 20]          | 8  | adam  | relu | 0.5789 | 0.01175 | 61  | 0.8627 | 0.02286 | 70 | 0.5956 | 0.02679 | 71 | 24.82 | 0.14 | 67.33 | 69 |
| [80, 80, 40, 40]      | 32 | Nadam | relu | 0.5782 | 0.01479 | 55  | 0.8631 | 0.02693 | 75 | 0.5953 | 0.02744 | 73 | 9.29  | 0.14 | 67.67 | 70 |
| [60, 20]              | 16 | Nadam | relu | 0.5807 | 0.01236 | 76  | 0.862  | 0.02456 | 64 | 0.5965 | 0.02609 | 64 | 14.16 | 0.11 | 68    | 71 |
| [80, 80, 80, 80]      | 32 | Nadam | relu | 0.5778 | 0.01901 | 49  | 0.8636 | 0.03884 | 78 | 0.5946 | 0.0373  | 79 | 9.36  | 0.15 | 68.67 | 72 |
| [60, 20]              | 16 | adam  | relu | 0.5831 | 0.01095 | 89  | 0.8616 | 0.02309 | 62 | 0.5971 | 0.02206 | 60 | 12.55 | 0.13 | 70.33 | 73 |
| [60, 40, 20]          | 16 | adam  | relu | 0.5819 | 0.01885 | 83  | 0.8622 | 0.03624 | 67 | 0.5959 | 0.03733 | 68 | 12.98 | 0.09 | 72.67 | 74 |
| [60, 60]              | 8  | Nadam | relu | 0.5811 | 0.01521 | 78  | 0.8629 | 0.02862 | 71 | 0.5957 | 0.02836 | 70 | 27.17 | 0.27 | 73    | 75 |
| [80, 40, 60]          | 16 | Nadam | relu | 0.5791 | 0.01203 | 64  | 0.8641 | 0.02979 | 80 | 0.5942 | 0.0317  | 80 | 15.83 | 0.22 | 74.67 | 76 |
| [60, 40, 20]          | 8  | Nadam | relu | 0.5793 | 0.01221 | 65  | 0.8646 | 0.02904 | 81 | 0.5939 | 0.02994 | 81 | 27.92 | 0.22 | 75.67 | 77 |
| [80, 60, 80, 40]      | 32 | adam  | relu | 0.5788 | 0.01452 | 60  | 0.8654 | 0.0283  | 86 | 0.5931 | 0.03062 | 86 | 8.05  | 0.16 | 77.33 | 78 |
| [60]                  | 16 | adam  | relu | 0.5851 | 0.01589 | 107 | 0.8622 | 0.03284 | 66 | 0.5964 | 0.03066 | 65 | 11.95 | 0.2  | 79.33 | 79 |
| [60, 40, 20]          | 16 | Nadam | relu | 0.5795 | 0.01256 | 67  | 0.8656 | 0.03108 | 87 | 0.5929 | 0.03441 | 87 | 14.84 | 0.13 | 80.33 | 80 |
| [80]                  | 32 | Nadam | relu | 0.5852 | 0.01913 | 108 | 0.8623 | 0.03918 | 68 | 0.596  | 0.03684 | 67 | 7.95  | 0.18 | 81    | 81 |
| [80, 80, 40, 40]      | 32 | adam  | relu | 0.5811 | 0.01678 | 79  | 0.8648 | 0.03002 | 84 | 0.5932 | 0.03626 | 85 | 7.97  | 0.16 | 82.67 | 82 |
| [80]                  | 32 | adam  | relu | 0.5835 | 0.01707 | 95  | 0.8635 | 0.03363 | 77 | 0.595  | 0.03316 | 77 | 7.14  | 0.11 | 83    | 83 |
| [60, 60]              | 8  | adam  | relu | 0.5803 | 0.01237 | 72  | 0.8659 | 0.02997 | 88 | 0.5927 | 0.03086 | 90 | 24.2  | 0.2  | 83.33 | 84 |
| [60, 20]              | 8  | Nadam | relu | 0.5828 | 0.01578 | 88  | 0.8647 | 0.02908 | 83 | 0.5935 | 0.02897 | 83 | 26.7  | 0.34 | 84.67 | 85 |
| [100]                 | 8  | Nadam | tanh | 0.5803 | 0.01916 | 73  | 0.8663 | 0.0408  | 92 | 0.5923 | 0.03622 | 91 | 28.91 | 0.53 | 85.33 | 86 |
| [80, 40, 60]          | 16 | adam  | relu | 0.5806 | 0.01129 | 75  | 0.866  | 0.02968 | 90 | 0.5922 | 0.03418 | 92 | 13.59 | 0.15 | 85.67 | 87 |
| [40, 40]              | 16 | Nadam | relu | 0.5835 | 0.01176 | 94  | 0.8647 | 0.02795 | 82 | 0.5937 | 0.02902 | 82 | 11.87 | 0.41 | 86    | 88 |

|                       |    |       |         |        |         |     |        |         |     |        |         |     |       |      |        |     |
|-----------------------|----|-------|---------|--------|---------|-----|--------|---------|-----|--------|---------|-----|-------|------|--------|-----|
| [60, 60]              | 32 | adam  | relu    | 0.5818 | 0.01164 | 82  | 0.8661 | 0.02995 | 91  | 0.5928 | 0.03079 | 89  | 7.18  | 0.15 | 87.33  | 89  |
| [60, 20]              | 32 | Nadam | relu    | 0.5807 | 0.01273 | 77  | 0.8666 | 0.03158 | 93  | 0.5916 | 0.03358 | 93  | 8.05  | 0.05 | 87.67  | 90  |
| [40, 80]              | 8  | adam  | relu    | 0.5827 | 0.01401 | 87  | 0.8659 | 0.03333 | 89  | 0.5928 | 0.03351 | 88  | 21.13 | 0.2  | 88     | 91  |
| [60]                  | 16 | Nadam | relu    | 0.587  | 0.01245 | 129 | 0.863  | 0.0298  | 72  | 0.5955 | 0.02903 | 72  | 13.33 | 0.1  | 91     | 92  |
| [40, 60, 80]          | 16 | adam  | relu    | 0.5822 | 0.01358 | 85  | 0.8682 | 0.02944 | 98  | 0.5904 | 0.03166 | 100 | 11.48 | 0.34 | 94.33  | 93  |
| [100, 80, 60, 40, 20] | 32 | adam  | relu    | 0.5797 | 0.01153 | 69  | 0.8697 | 0.02413 | 111 | 0.5893 | 0.0245  | 108 | 9.57  | 0.43 | 96     | 94  |
| [60, 20]              | 32 | adam  | relu    | 0.5844 | 0.01397 | 101 | 0.8671 | 0.02878 | 94  | 0.5914 | 0.03218 | 94  | 7.1   | 0.17 | 96.33  | 95  |
| [60, 40, 20]          | 32 | adam  | relu    | 0.5833 | 0.0075  | 92  | 0.8682 | 0.02388 | 99  | 0.5905 | 0.02749 | 99  | 7.33  | 0.13 | 96.67  | 96  |
| [40, 80]              | 32 | adam  | relu    | 0.5846 | 0.01162 | 102 | 0.8678 | 0.02681 | 95  | 0.5907 | 0.02974 | 96  | 6.1   | 0.2  | 97.67  | 97  |
| [40, 60, 80]          | 32 | adam  | relu    | 0.5844 | 0.01952 | 100 | 0.8683 | 0.03262 | 100 | 0.5906 | 0.0328  | 97  | 6.3   | 0.27 | 99     | 98  |
| [60]                  | 32 | adam  | relu    | 0.5869 | 0.01218 | 128 | 0.865  | 0.02927 | 85  | 0.5934 | 0.03066 | 84  | 6.88  | 0.07 | 99     | 99  |
| [80, 80, 80, 80]      | 32 | adam  | relu    | 0.5831 | 0.01677 | 90  | 0.8686 | 0.03098 | 102 | 0.5895 | 0.03346 | 106 | 8.23  | 0.13 | 99.33  | 100 |
| [40, 60, 80]          | 8  | Nadam | relu    | 0.5852 | 0.01307 | 111 | 0.8679 | 0.03231 | 96  | 0.5908 | 0.03625 | 95  | 24.27 | 0.65 | 100.67 | 101 |
| [40, 80]              | 16 | adam  | relu    | 0.5854 | 0.01768 | 112 | 0.868  | 0.03797 | 97  | 0.5905 | 0.03616 | 98  | 10.61 | 0.32 | 102.33 | 102 |
| [60, 20]              | 8  | adam  | relu    | 0.5854 | 0.0169  | 113 | 0.8683 | 0.03305 | 101 | 0.5902 | 0.03466 | 101 | 23.71 | 0.23 | 105    | 103 |
| [100, 60]             | 16 | Nadam | tanh    | 0.5824 | 0.01296 | 86  | 0.8715 | 0.02878 | 115 | 0.5873 | 0.0306  | 115 | 16.42 | 0.14 | 105.33 | 104 |
| [80, 40]              | 8  | Nadam | tanh    | 0.5799 | 0.00875 | 70  | 0.8722 | 0.02772 | 126 | 0.5866 | 0.02579 | 127 | 28.05 | 0.09 | 107.67 | 105 |
| [100]                 | 8  | adam  | tanh    | 0.5852 | 0.01549 | 110 | 0.8693 | 0.03316 | 106 | 0.5894 | 0.03346 | 107 | 26.37 | 0.3  | 107.67 | 106 |
| [40, 80, 80, 40]      | 16 | adam  | relu    | 0.5836 | 0.01443 | 96  | 0.8715 | 0.0276  | 116 | 0.587  | 0.0349  | 122 | 11.62 | 0.38 | 111.33 | 107 |
| [80, 80, 40, 40]      | 8  | adam  | sigmoid | 0.5842 | 0.01603 | 99  | 0.8715 | 0.03449 | 121 | 0.5873 | 0.03517 | 116 | 26.24 | 0.12 | 112    | 108 |
| [60]                  | 16 | Nadam | tanh    | 0.5848 | 0.01472 | 103 | 0.8715 | 0.02882 | 119 | 0.5873 | 0.02916 | 117 | 13.42 | 0.29 | 113    | 109 |
| [80, 40]              | 16 | adam  | tanh    | 0.5852 | 0.01672 | 109 | 0.8712 | 0.03469 | 114 | 0.5872 | 0.03467 | 119 | 13.27 | 0.11 | 114    | 110 |
| [80]                  | 8  | adam  | tanh    | 0.5878 | 0.01096 | 136 | 0.8687 | 0.02694 | 104 | 0.5902 | 0.0264  | 102 | 24.25 | 0.34 | 114    | 111 |
| [40, 80, 80, 40]      | 8  | adam  | relu    | 0.585  | 0.01571 | 106 | 0.8715 | 0.03161 | 117 | 0.5871 | 0.03486 | 120 | 22.21 | 0.66 | 114.33 | 112 |
| [40, 80]              | 16 | Nadam | relu    | 0.5863 | 0.01435 | 118 | 0.8711 | 0.02978 | 113 | 0.5881 | 0.02881 | 112 | 12.13 | 0.33 | 114.33 | 113 |
| [40, 40]              | 16 | adam  | relu    | 0.5871 | 0.01617 | 131 | 0.8694 | 0.03401 | 108 | 0.5892 | 0.034   | 109 | 10.63 | 0.51 | 116    | 114 |
| [100]                 | 16 | adam  | tanh    | 0.5871 | 0.01531 | 132 | 0.8711 | 0.03412 | 112 | 0.5876 | 0.03362 | 114 | 14    | 0.08 | 119.33 | 115 |
| [40, 60, 80]          | 32 | Nadam | relu    | 0.5869 | 0.01431 | 126 | 0.8715 | 0.02889 | 120 | 0.5876 | 0.02779 | 113 | 7.09  | 0.14 | 119.67 | 116 |
| [40, 40]              | 8  | Nadam | relu    | 0.588  | 0.01402 | 141 | 0.8697 | 0.03027 | 110 | 0.5887 | 0.03148 | 111 | 23.43 | 0.54 | 120.67 | 117 |
| [40, 80, 80, 40]      | 16 | Nadam | relu    | 0.5866 | 0.01495 | 121 | 0.8716 | 0.03346 | 122 | 0.5871 | 0.03435 | 121 | 13.62 | 0.29 | 121.33 | 118 |
| [60]                  | 32 | Nadam | relu    | 0.5898 | 0.01605 | 159 | 0.8686 | 0.02991 | 103 | 0.5901 | 0.03141 | 104 | 7.54  | 0.03 | 122    | 119 |

|                  |    |       |         |        |         |     |        |         |     |        |         |     |       |      |        |     |
|------------------|----|-------|---------|--------|---------|-----|--------|---------|-----|--------|---------|-----|-------|------|--------|-----|
| [100, 60]        | 16 | adam  | tanh    | 0.5864 | 0.01733 | 120 | 0.8719 | 0.03416 | 124 | 0.5869 | 0.03202 | 124 | 14.72 | 0.2  | 122.67 | 120 |
| [40]             | 8  | adam  | relu    | 0.5898 | 0.01385 | 160 | 0.8688 | 0.03051 | 105 | 0.5901 | 0.0296  | 103 | 19.65 | 0.34 | 122.67 | 121 |
| [80, 80]         | 8  | Nadam | tanh    | 0.5834 | 0.00985 | 93  | 0.8755 | 0.02734 | 139 | 0.5834 | 0.03218 | 139 | 28.24 | 0.33 | 123.67 | 122 |
| [60]             | 8  | Nadam | tanh    | 0.5879 | 0.02213 | 138 | 0.8715 | 0.03689 | 118 | 0.5873 | 0.03398 | 118 | 25.3  | 0.22 | 124.67 | 123 |
| [40, 60, 80]     | 16 | Nadam | relu    | 0.5858 | 0.01414 | 115 | 0.8745 | 0.03075 | 133 | 0.5844 | 0.03287 | 133 | 12.73 | 0.44 | 127    | 124 |
| [40]             | 8  | Nadam | relu    | 0.5907 | 0.01367 | 173 | 0.8693 | 0.03082 | 107 | 0.5898 | 0.03026 | 105 | 21.53 | 0.36 | 128.33 | 125 |
| [40, 40]         | 32 | Nadam | relu    | 0.5902 | 0.01819 | 167 | 0.8697 | 0.035   | 109 | 0.589  | 0.03323 | 110 | 6.56  | 0.18 | 128.67 | 126 |
| [40, 60, 80]     | 8  | adam  | relu    | 0.5867 | 0.01735 | 123 | 0.8744 | 0.03465 | 132 | 0.5848 | 0.03515 | 132 | 21.57 | 0.55 | 129    | 127 |
| [100, 60]        | 8  | Nadam | tanh    | 0.5836 | 0.01418 | 97  | 0.8767 | 0.03262 | 145 | 0.5817 | 0.03473 | 146 | 30.82 | 0.47 | 129.33 | 128 |
| [80]             | 16 | Nadam | tanh    | 0.5878 | 0.01477 | 137 | 0.8723 | 0.03564 | 127 | 0.5863 | 0.03527 | 128 | 14.22 | 0.17 | 130.67 | 129 |
| [60]             | 8  | adam  | tanh    | 0.5885 | 0.01569 | 146 | 0.8718 | 0.03359 | 123 | 0.587  | 0.03468 | 123 | 23.24 | 0.52 | 130.67 | 130 |
| [40, 40]         | 8  | adam  | relu    | 0.5878 | 0.01647 | 135 | 0.8734 | 0.03248 | 129 | 0.5857 | 0.03353 | 129 | 20.36 | 0.65 | 131    | 131 |
| [80, 80]         | 16 | adam  | tanh    | 0.5863 | 0.01858 | 117 | 0.8754 | 0.03687 | 137 | 0.5829 | 0.03976 | 141 | 13.33 | 0.19 | 131.67 | 132 |
| [80]             | 16 | adam  | tanh    | 0.5881 | 0.01302 | 144 | 0.8723 | 0.02907 | 128 | 0.5868 | 0.02854 | 126 | 12.99 | 0.15 | 132.67 | 133 |
| [80]             | 8  | Nadam | tanh    | 0.5881 | 0.01147 | 143 | 0.874  | 0.02856 | 130 | 0.5851 | 0.02836 | 130 | 27.23 | 0.45 | 134.33 | 134 |
| [60, 40, 20]     | 32 | Nadam | relu    | 0.5892 | 0.01047 | 154 | 0.874  | 0.02973 | 131 | 0.5849 | 0.03348 | 131 | 8.48  | 0.06 | 138.67 | 135 |
| [80, 40]         | 16 | Nadam | tanh    | 0.5889 | 0.01478 | 151 | 0.8752 | 0.03275 | 135 | 0.5839 | 0.03138 | 135 | 15.41 | 0.43 | 140.33 | 136 |
| [60, 20]         | 8  | adam  | tanh    | 0.5869 | 0.01202 | 127 | 0.8777 | 0.02832 | 149 | 0.5815 | 0.02725 | 148 | 24.06 | 0.31 | 141.33 | 137 |
| [100, 100]       | 16 | adam  | tanh    | 0.587  | 0.0139  | 130 | 0.8774 | 0.02743 | 147 | 0.5817 | 0.03144 | 147 | 14.83 | 0.28 | 141.33 | 138 |
| [100, 100]       | 16 | Nadam | tanh    | 0.5868 | 0.01013 | 125 | 0.8779 | 0.03076 | 152 | 0.5814 | 0.03048 | 150 | 16.74 | 0.14 | 142.33 | 139 |
| [40, 80]         | 32 | Nadam | relu    | 0.5886 | 0.01591 | 147 | 0.8757 | 0.03041 | 141 | 0.5833 | 0.03208 | 140 | 6.68  | 0.18 | 142.67 | 140 |
| [100, 100]       | 8  | Nadam | tanh    | 0.5849 | 0.01278 | 105 | 0.8789 | 0.03105 | 162 | 0.5804 | 0.03114 | 162 | 30.6  | 0.46 | 143    | 141 |
| [100, 60, 40]    | 32 | Nadam | tanh    | 0.5867 | 0.0118  | 124 | 0.878  | 0.02883 | 154 | 0.5811 | 0.02948 | 154 | 10.53 | 0.53 | 144    | 142 |
| [100, 60]        | 32 | Nadam | tanh    | 0.5896 | 0.01296 | 157 | 0.8762 | 0.02854 | 143 | 0.5827 | 0.03002 | 142 | 9.95  | 0.43 | 147.33 | 143 |
| [100]            | 16 | Nadam | tanh    | 0.5899 | 0.01312 | 164 | 0.8756 | 0.02543 | 140 | 0.5836 | 0.02665 | 138 | 15.8  | 0.23 | 147.33 | 144 |
| [80, 40]         | 8  | adam  | tanh    | 0.5854 | 0.01253 | 114 | 0.8791 | 0.02975 | 164 | 0.5798 | 0.03342 | 165 | 24.89 | 0.19 | 147.67 | 145 |
| [40, 80, 80, 40] | 32 | Nadam | relu    | 0.5895 | 0.01213 | 155 | 0.8766 | 0.02866 | 144 | 0.5825 | 0.03278 | 144 | 7.58  | 0.39 | 147.67 | 146 |
| [60, 60]         | 8  | Nadam | tanh    | 0.5875 | 0.01439 | 133 | 0.8783 | 0.03237 | 155 | 0.5806 | 0.03433 | 158 | 26.9  | 0.31 | 148.67 | 147 |
| [80, 80]         | 8  | Nadam | sigmoid | 0.5879 | 0.01314 | 140 | 0.8779 | 0.0315  | 151 | 0.581  | 0.0324  | 155 | 28.95 | 0.65 | 148.67 | 148 |
| [40, 40]         | 32 | adam  | relu    | 0.5907 | 0.0125  | 174 | 0.8752 | 0.0234  | 136 | 0.5837 | 0.02928 | 136 | 5.78  | 0.19 | 148.67 | 149 |
| [40]             | 16 | adam  | relu    | 0.5931 | 0.01406 | 200 | 0.8721 | 0.02986 | 125 | 0.5868 | 0.03178 | 125 | 10.6  | 0.16 | 150    | 150 |

|                       |    |       |         |        |         |     |        |         |     |        |         |     |       |      |        |     |
|-----------------------|----|-------|---------|--------|---------|-----|--------|---------|-----|--------|---------|-----|-------|------|--------|-----|
| [100, 100]            | 32 | Nadam | tanh    | 0.5914 | 0.01555 | 182 | 0.8755 | 0.02813 | 138 | 0.5837 | 0.03078 | 137 | 10.18 | 0.29 | 152.33 | 151 |
| [100, 60]             | 8  | adam  | tanh    | 0.5864 | 0.01328 | 119 | 0.8801 | 0.02683 | 171 | 0.5789 | 0.03181 | 171 | 27.3  | 0.47 | 153.67 | 152 |
| [100, 60]             | 32 | adam  | tanh    | 0.5898 | 0.01689 | 162 | 0.8778 | 0.03204 | 150 | 0.5811 | 0.03506 | 153 | 8.76  | 0.05 | 155    | 153 |
| [100, 60, 40]         | 16 | adam  | tanh    | 0.586  | 0.0157  | 116 | 0.8806 | 0.03312 | 176 | 0.5786 | 0.03332 | 177 | 15.27 | 0.09 | 156.33 | 154 |
| [100, 100]            | 32 | adam  | tanh    | 0.5895 | 0.00939 | 156 | 0.8785 | 0.02411 | 158 | 0.5807 | 0.02885 | 156 | 8.85  | 0.15 | 156.67 | 155 |
| [80, 80]              | 32 | adam  | tanh    | 0.5912 | 0.01374 | 179 | 0.8777 | 0.02949 | 148 | 0.5815 | 0.03145 | 149 | 7.55  | 0.12 | 158.67 | 156 |
| [40]                  | 16 | Nadam | relu    | 0.5944 | 0.01579 | 209 | 0.875  | 0.03186 | 134 | 0.584  | 0.0328  | 134 | 11.09 | 0.2  | 159    | 157 |
| [100, 60, 40]         | 8  | adam  | sigmoid | 0.5879 | 0.01079 | 139 | 0.88   | 0.02896 | 169 | 0.5792 | 0.03183 | 170 | 28.19 | 0.6  | 159.33 | 158 |
| [100, 60]             | 8  | adam  | sigmoid | 0.5907 | 0.01403 | 175 | 0.878  | 0.0299  | 153 | 0.5812 | 0.03105 | 152 | 27.06 | 0.61 | 160    | 159 |
| [40, 80, 80, 40]      | 8  | Nadam | relu    | 0.5926 | 0.01811 | 195 | 0.876  | 0.03837 | 142 | 0.5826 | 0.04099 | 143 | 25.31 | 0.62 | 160    | 160 |
| [60, 20]              | 16 | Nadam | tanh    | 0.5886 | 0.01462 | 148 | 0.8799 | 0.03034 | 167 | 0.5794 | 0.02828 | 168 | 14.22 | 0.2  | 161    | 161 |
| [60, 20]              | 16 | adam  | tanh    | 0.5904 | 0.01238 | 168 | 0.8784 | 0.02828 | 157 | 0.5806 | 0.02756 | 160 | 12.66 | 0.08 | 161.67 | 162 |
| [80, 80]              | 16 | Nadam | tanh    | 0.5892 | 0.01222 | 153 | 0.88   | 0.03012 | 170 | 0.5794 | 0.02947 | 167 | 15.16 | 0.2  | 163.33 | 163 |
| [100, 60, 40]         | 32 | adam  | tanh    | 0.5909 | 0.01477 | 177 | 0.8784 | 0.03121 | 156 | 0.5806 | 0.0345  | 159 | 9.04  | 0.02 | 164    | 164 |
| [100, 100]            | 8  | adam  | sigmoid | 0.5897 | 0.01272 | 158 | 0.8799 | 0.02465 | 168 | 0.5793 | 0.02809 | 169 | 26.95 | 0.35 | 165    | 165 |
| [80, 40]              | 32 | Nadam | tanh    | 0.5913 | 0.0102  | 180 | 0.8787 | 0.02202 | 161 | 0.5807 | 0.02529 | 157 | 8.57  | 0.17 | 166    | 166 |
| [60, 20]              | 32 | adam  | tanh    | 0.5906 | 0.01159 | 170 | 0.8794 | 0.02861 | 166 | 0.5797 | 0.02998 | 166 | 7.18  | 0.15 | 167.33 | 167 |
| [100, 60, 40]         | 8  | adam  | tanh    | 0.5849 | 0.01565 | 104 | 0.8841 | 0.03742 | 199 | 0.5752 | 0.03686 | 200 | 28.13 | 0.27 | 167.67 | 168 |
| [100, 100]            | 8  | adam  | tanh    | 0.5883 | 0.01217 | 145 | 0.8819 | 0.03273 | 182 | 0.5773 | 0.0327  | 183 | 27.06 | 0.27 | 170    | 169 |
| [40, 80, 80, 40]      | 32 | adam  | relu    | 0.5913 | 0.01386 | 181 | 0.8792 | 0.03055 | 165 | 0.5799 | 0.03189 | 164 | 6.41  | 0.21 | 170    | 170 |
| [40]                  | 8  | Nadam | tanh    | 0.5921 | 0.01749 | 189 | 0.8785 | 0.03361 | 160 | 0.5805 | 0.03405 | 161 | 21.14 | 0.69 | 170    | 171 |
| [100, 100]            | 8  | Nadam | sigmoid | 0.5901 | 0.01255 | 166 | 0.8803 | 0.02963 | 172 | 0.5788 | 0.03274 | 174 | 30.3  | 0.37 | 170.67 | 172 |
| [80, 40]              | 32 | adam  | tanh    | 0.5906 | 0.0159  | 171 | 0.8804 | 0.03141 | 173 | 0.5786 | 0.03491 | 176 | 7.43  | 0.05 | 173.33 | 173 |
| [80, 80]              | 8  | adam  | tanh    | 0.5898 | 0.01019 | 161 | 0.8821 | 0.02724 | 184 | 0.5773 | 0.02978 | 181 | 25.38 | 0.28 | 175.33 | 174 |
| [80, 80, 40, 40]      | 8  | Nadam | sigmoid | 0.5908 | 0.01633 | 176 | 0.8806 | 0.03597 | 175 | 0.5786 | 0.03448 | 175 | 30.11 | 0.22 | 175.33 | 175 |
| [60]                  | 16 | adam  | tanh    | 0.5933 | 0.01473 | 201 | 0.879  | 0.03246 | 163 | 0.5803 | 0.02982 | 163 | 11.85 | 0.23 | 175.67 | 176 |
| [100, 60]             | 8  | Nadam | sigmoid | 0.59   | 0.01551 | 165 | 0.8815 | 0.03065 | 181 | 0.5773 | 0.03592 | 182 | 30.3  | 0.44 | 176    | 177 |
| [100, 80, 60, 40, 20] | 16 | Nadam | tanh    | 0.588  | 0.0208  | 142 | 0.8835 | 0.04223 | 194 | 0.5755 | 0.04278 | 194 | 18.44 | 0.17 | 176.67 | 178 |
| [80, 60, 80, 40]      | 8  | Nadam | sigmoid | 0.5917 | 0.01383 | 186 | 0.8806 | 0.0296  | 174 | 0.5788 | 0.02872 | 172 | 30.28 | 0.33 | 177.33 | 179 |
| [100, 80, 60, 40, 20] | 16 | adam  | tanh    | 0.5889 | 0.01471 | 150 | 0.8833 | 0.03817 | 193 | 0.5754 | 0.04161 | 195 | 16.1  | 0.24 | 179.33 | 180 |
| [40]                  | 32 | adam  | relu    | 0.5974 | 0.01189 | 232 | 0.8785 | 0.02734 | 159 | 0.5813 | 0.02513 | 151 | 5.57  | 0.15 | 180.67 | 181 |

|                       |    |       |         |        |         |     |        |         |     |        |         |     |       |      |        |     |
|-----------------------|----|-------|---------|--------|---------|-----|--------|---------|-----|--------|---------|-----|-------|------|--------|-----|
| [100, 60, 40]         | 16 | Nadam | tanh    | 0.589  | 0.00928 | 152 | 0.8841 | 0.0251  | 198 | 0.5753 | 0.02876 | 198 | 17.3  | 0.16 | 182.67 | 182 |
| [80, 40]              | 8  | Nadam | sigmoid | 0.5911 | 0.01781 | 178 | 0.8824 | 0.03199 | 185 | 0.5767 | 0.0357  | 186 | 28.25 | 0.26 | 183    | 183 |
| [80, 80]              | 32 | Nadam | tanh    | 0.5925 | 0.0147  | 194 | 0.8809 | 0.0309  | 177 | 0.5783 | 0.03179 | 178 | 8.78  | 0.38 | 183    | 184 |
| [40]                  | 8  | adam  | tanh    | 0.5941 | 0.01415 | 202 | 0.8814 | 0.0297  | 180 | 0.5781 | 0.02961 | 179 | 19.36 | 0.57 | 187    | 185 |
| [60, 60]              | 16 | Nadam | tanh    | 0.5917 | 0.01344 | 187 | 0.8828 | 0.02783 | 188 | 0.5767 | 0.02911 | 187 | 14.24 | 0.19 | 187.33 | 186 |
| [80]                  | 8  | Nadam | sigmoid | 0.5921 | 0.01873 | 188 | 0.8827 | 0.03367 | 187 | 0.5765 | 0.03398 | 188 | 26.76 | 0.45 | 187.67 | 187 |
| [80, 40]              | 8  | adam  | sigmoid | 0.5921 | 0.01544 | 190 | 0.8829 | 0.03124 | 191 | 0.5764 | 0.03446 | 191 | 25.43 | 0.29 | 190.67 | 188 |
| [60, 20]              | 8  | Nadam | tanh    | 0.5899 | 0.01206 | 163 | 0.8845 | 0.02686 | 202 | 0.5745 | 0.03067 | 208 | 26.61 | 0.25 | 191    | 189 |
| [80, 60, 80, 40]      | 32 | Nadam | tanh    | 0.595  | 0.01415 | 214 | 0.8813 | 0.03332 | 179 | 0.5778 | 0.03455 | 180 | 9.35  | 0.12 | 191    | 190 |
| [60, 60]              | 16 | adam  | tanh    | 0.5916 | 0.00985 | 184 | 0.884  | 0.02733 | 197 | 0.5753 | 0.03118 | 197 | 12.83 | 0.15 | 192.67 | 191 |
| [100]                 | 32 | Nadam | tanh    | 0.5928 | 0.01704 | 198 | 0.8828 | 0.03199 | 190 | 0.5764 | 0.03142 | 190 | 9.33  | 0.12 | 192.67 | 192 |
| [60, 40, 20]          | 8  | Nadam | tanh    | 0.5887 | 0.01122 | 149 | 0.886  | 0.03044 | 218 | 0.5736 | 0.03123 | 216 | 27.73 | 0.3  | 194.33 | 193 |
| [80]                  | 32 | Nadam | tanh    | 0.5944 | 0.02075 | 206 | 0.8828 | 0.03695 | 189 | 0.5763 | 0.03621 | 192 | 8.26  | 0.22 | 195.67 | 194 |
| [100, 60, 40]         | 8  | Nadam | tanh    | 0.5866 | 0.0094  | 122 | 0.8874 | 0.0276  | 234 | 0.5721 | 0.0314  | 234 | 31.23 | 0.37 | 196.67 | 195 |
| [60, 20]              | 32 | Nadam | tanh    | 0.5944 | 0.01078 | 207 | 0.8836 | 0.02582 | 195 | 0.5761 | 0.02586 | 193 | 8.13  | 0.08 | 198.33 | 196 |
| [40, 40]              | 8  | Nadam | tanh    | 0.5922 | 0.0124  | 191 | 0.8843 | 0.03066 | 200 | 0.5749 | 0.03083 | 205 | 22.44 | 0.49 | 198.67 | 197 |
| [80, 80]              | 8  | adam  | sigmoid | 0.5923 | 0.01521 | 192 | 0.8846 | 0.02755 | 204 | 0.5752 | 0.02971 | 201 | 25.12 | 0.52 | 199    | 198 |
| [80, 80, 80, 80]      | 8  | adam  | sigmoid | 0.5916 | 0.01257 | 185 | 0.885  | 0.02674 | 210 | 0.5744 | 0.02847 | 210 | 26.42 | 0.23 | 201.67 | 199 |
| [100, 60, 40]         | 8  | Nadam | sigmoid | 0.5924 | 0.0158  | 193 | 0.8846 | 0.03164 | 205 | 0.5744 | 0.03417 | 209 | 32.06 | 0.49 | 202.33 | 200 |
| [100, 60]             | 8  | sgd   | relu    | 0.6112 | 0.0236  | 320 | 0.8773 | 0.03185 | 146 | 0.5822 | 0.02916 | 145 | 22.07 | 0.2  | 203.67 | 201 |
| [60, 60]              | 8  | adam  | tanh    | 0.5906 | 0.01488 | 172 | 0.8863 | 0.03495 | 223 | 0.5733 | 0.03281 | 221 | 24.5  | 0.2  | 205.33 | 202 |
| [40, 40]              | 16 | adam  | tanh    | 0.5929 | 0.01244 | 199 | 0.885  | 0.0285  | 211 | 0.5743 | 0.03375 | 211 | 10.75 | 0.33 | 207    | 203 |
| [100]                 | 32 | adam  | tanh    | 0.5948 | 0.0126  | 212 | 0.8847 | 0.02913 | 206 | 0.575  | 0.02801 | 203 | 8.46  | 0.18 | 207    | 204 |
| [20]                  | 8  | Nadam | relu    | 0.6    | 0.01432 | 257 | 0.8821 | 0.03307 | 183 | 0.5773 | 0.03257 | 184 | 15.78 | 0.08 | 208    | 205 |
| [80, 40, 60]          | 32 | adam  | tanh    | 0.5968 | 0.01668 | 231 | 0.884  | 0.02946 | 196 | 0.5753 | 0.03517 | 199 | 7.75  | 0.14 | 208.67 | 206 |
| [100]                 | 8  | Nadam | sigmoid | 0.5941 | 0.01807 | 203 | 0.8856 | 0.03172 | 214 | 0.574  | 0.0304  | 213 | 29.04 | 0.52 | 210    | 207 |
| [80, 80, 40, 40]      | 8  | Nadam | tanh    | 0.5904 | 0.00941 | 169 | 0.8872 | 0.02517 | 232 | 0.5724 | 0.02415 | 231 | 29.98 | 0.24 | 210.67 | 208 |
| [80, 60, 80, 40]      | 8  | adam  | sigmoid | 0.5949 | 0.01536 | 213 | 0.8849 | 0.02886 | 209 | 0.5743 | 0.03395 | 212 | 26.65 | 0.33 | 211.33 | 209 |
| [80, 40, 60]          | 16 | Nadam | tanh    | 0.5951 | 0.01437 | 215 | 0.8854 | 0.03168 | 212 | 0.5738 | 0.03343 | 214 | 15.61 | 0.16 | 213.67 | 210 |
| [100, 80, 60, 40, 20] | 8  | Nadam | tanh    | 0.5875 | 0.01111 | 134 | 0.8892 | 0.02881 | 252 | 0.5702 | 0.0327  | 256 | 33.94 | 0.51 | 214    | 211 |
| [80, 80]              | 8  | sgd   | relu    | 0.6058 | 0.0152  | 291 | 0.881  | 0.02403 | 178 | 0.5788 | 0.02558 | 173 | 18.94 | 0.53 | 214    | 212 |

|                       |    |       |         |        |         |     |        |         |     |        |         |     |       |      |        |     |
|-----------------------|----|-------|---------|--------|---------|-----|--------|---------|-----|--------|---------|-----|-------|------|--------|-----|
| [100]                 | 8  | adam  | sigmoid | 0.5943 | 0.01546 | 204 | 0.8861 | 0.03393 | 220 | 0.5733 | 0.03337 | 223 | 26.44 | 0.62 | 215.67 | 213 |
| [80, 40, 60]          | 32 | Nadam | tanh    | 0.5954 | 0.01235 | 219 | 0.8859 | 0.02784 | 217 | 0.5737 | 0.03119 | 215 | 8.94  | 0.1  | 217    | 214 |
| [20, 100]             | 8  | adam  | relu    | 0.6033 | 0.01863 | 277 | 0.8827 | 0.03335 | 186 | 0.5764 | 0.03705 | 189 | 15.51 | 0.25 | 217.33 | 215 |
| [80, 40, 60]          | 8  | Nadam | tanh    | 0.5916 | 0.01789 | 183 | 0.8874 | 0.03864 | 233 | 0.5717 | 0.03786 | 238 | 29.48 | 0.25 | 218    | 216 |
| [80, 40, 60]          | 8  | adam  | sigmoid | 0.5956 | 0.01969 | 221 | 0.8856 | 0.03519 | 215 | 0.5733 | 0.03995 | 218 | 25.76 | 0.26 | 218    | 217 |
| [20, 20]              | 8  | adam  | relu    | 0.5994 | 0.01909 | 250 | 0.8844 | 0.03483 | 201 | 0.575  | 0.03576 | 204 | 15.17 | 0.17 | 218.33 | 218 |
| [20, 100]             | 16 | adam  | relu    | 0.5987 | 0.01574 | 246 | 0.8849 | 0.03403 | 208 | 0.5746 | 0.03567 | 207 | 9.55  | 0.25 | 220.33 | 219 |
| [60, 60]              | 8  | adam  | sigmoid | 0.5965 | 0.01504 | 229 | 0.8858 | 0.03215 | 216 | 0.5735 | 0.03421 | 217 | 23.98 | 0.32 | 220.67 | 220 |
| [100, 80, 60, 40, 20] | 8  | adam  | sigmoid | 0.5952 | 0.01394 | 217 | 0.8861 | 0.02689 | 221 | 0.5732 | 0.03163 | 225 | 29.28 | 0.12 | 221    | 221 |
| [60, 40, 20]          | 16 | Nadam | tanh    | 0.5944 | 0.0105  | 208 | 0.8869 | 0.02537 | 228 | 0.5727 | 0.02801 | 228 | 14.8  | 0.14 | 221.33 | 222 |
| [80, 40, 60]          | 8  | adam  | tanh    | 0.5928 | 0.01734 | 197 | 0.8876 | 0.0371  | 236 | 0.5718 | 0.03697 | 237 | 25.84 | 0.3  | 223.33 | 223 |
| [80]                  | 8  | adam  | sigmoid | 0.5954 | 0.01528 | 218 | 0.8866 | 0.02984 | 226 | 0.5731 | 0.02842 | 226 | 24.16 | 0.28 | 223.33 | 224 |
| [40, 80, 80, 40]      | 8  | Nadam | tanh    | 0.5951 | 0.01114 | 216 | 0.8872 | 0.02932 | 231 | 0.5725 | 0.03146 | 230 | 25.78 | 1.09 | 225.67 | 225 |
| [80]                  | 32 | adam  | tanh    | 0.5965 | 0.01075 | 228 | 0.8867 | 0.02907 | 227 | 0.5725 | 0.02916 | 229 | 7.12  | 0.03 | 228    | 226 |
| [40]                  | 16 | adam  | tanh    | 0.5981 | 0.0137  | 241 | 0.8862 | 0.02892 | 222 | 0.5733 | 0.03021 | 222 | 9.79  | 0.22 | 228.33 | 227 |
| [60, 40, 20]          | 32 | adam  | tanh    | 0.5984 | 0.01273 | 244 | 0.8865 | 0.02763 | 225 | 0.5732 | 0.02534 | 224 | 7.37  | 0.12 | 231    | 228 |
| [40, 80, 80, 40]      | 8  | Nadam | sigmoid | 0.5961 | 0.01046 | 226 | 0.8879 | 0.02711 | 239 | 0.5715 | 0.03034 | 242 | 25.35 | 0.67 | 235.67 | 229 |
| [40]                  | 32 | Nadam | relu    | 0.602  | 0.01831 | 270 | 0.886  | 0.03589 | 219 | 0.5733 | 0.03827 | 220 | 5.95  | 0.16 | 236.33 | 230 |
| [100, 80, 60, 40, 20] | 8  | Nadam | sigmoid | 0.5956 | 0.0099  | 222 | 0.8883 | 0.02876 | 244 | 0.5711 | 0.02999 | 246 | 33.81 | 0.21 | 237.33 | 231 |
| [80, 80, 80, 80]      | 8  | sgd   | relu    | 0.6134 | 0.0181  | 337 | 0.8831 | 0.03356 | 192 | 0.5768 | 0.03239 | 185 | 73.86 | 2.4  | 238    | 232 |
| [60, 60]              | 32 | adam  | tanh    | 0.5997 | 0.01657 | 253 | 0.8871 | 0.03284 | 230 | 0.5722 | 0.03356 | 233 | 7.28  | 0.21 | 238.67 | 233 |
| [40, 80]              | 8  | Nadam | tanh    | 0.5955 | 0.0167  | 220 | 0.8888 | 0.03375 | 250 | 0.5706 | 0.03498 | 248 | 22.54 | 0.55 | 239.33 | 234 |
| [80, 60, 80, 40]      | 16 | Nadam | tanh    | 0.5977 | 0.00936 | 238 | 0.8879 | 0.02901 | 240 | 0.5715 | 0.03299 | 241 | 16.51 | 0.32 | 239.67 | 235 |
| [20, 100]             | 16 | Nadam | relu    | 0.6025 | 0.01744 | 274 | 0.8864 | 0.03559 | 224 | 0.5729 | 0.03826 | 227 | 10.53 | 0.26 | 241.67 | 236 |
| [40, 40]              | 8  | sgd   | relu    | 0.6121 | 0.02    | 327 | 0.8845 | 0.03151 | 203 | 0.5754 | 0.02901 | 196 | 16.78 | 0.03 | 242    | 237 |
| [60, 40, 20]          | 16 | adam  | tanh    | 0.5976 | 0.01853 | 236 | 0.8886 | 0.03562 | 248 | 0.5707 | 0.03725 | 247 | 13.25 | 0.19 | 243.67 | 238 |
| [80, 40, 60]          | 8  | Nadam | sigmoid | 0.5967 | 0.01248 | 230 | 0.8893 | 0.02772 | 254 | 0.5706 | 0.02972 | 250 | 29.24 | 0.25 | 244.67 | 239 |
| [80, 80, 40, 40]      | 16 | adam  | sigmoid | 0.5976 | 0.01743 | 237 | 0.8886 | 0.03034 | 247 | 0.5705 | 0.03495 | 252 | 14.31 | 0.25 | 245.33 | 240 |
| [40, 80]              | 16 | adam  | tanh    | 0.5992 | 0.01729 | 249 | 0.8883 | 0.03028 | 245 | 0.5711 | 0.03293 | 244 | 10.47 | 0.38 | 246    | 241 |
| [80, 40, 60]          | 16 | adam  | tanh    | 0.5946 | 0.00745 | 211 | 0.891  | 0.02209 | 264 | 0.5688 | 0.02387 | 265 | 13.91 | 0.16 | 246.67 | 242 |
| [80, 80, 80, 80]      | 8  | Nadam | sigmoid | 0.5975 | 0.01075 | 235 | 0.8893 | 0.02233 | 256 | 0.5706 | 0.0243  | 249 | 30.73 | 0.36 | 246.67 | 243 |

|                       |    |       |         |        |         |     |        |         |     |        |         |     |       |      |        |     |
|-----------------------|----|-------|---------|--------|---------|-----|--------|---------|-----|--------|---------|-----|-------|------|--------|-----|
| [40, 40]              | 8  | adam  | tanh    | 0.596  | 0.01524 | 225 | 0.8897 | 0.03084 | 259 | 0.5698 | 0.03175 | 259 | 20.45 | 0.45 | 247.67 | 244 |
| [80, 60, 80, 40]      | 8  | Nadam | tanh    | 0.5944 | 0.0117  | 205 | 0.8918 | 0.03015 | 271 | 0.5681 | 0.03243 | 269 | 30.14 | 0.21 | 248.33 | 245 |
| [40, 40]              | 16 | Nadam | tanh    | 0.5983 | 0.01144 | 242 | 0.8889 | 0.02381 | 251 | 0.5704 | 0.02775 | 255 | 11.97 | 0.52 | 249.33 | 246 |
| [80, 80, 80, 80]      | 32 | Nadam | tanh    | 0.6008 | 0.00987 | 262 | 0.8883 | 0.03077 | 242 | 0.5711 | 0.03482 | 245 | 9.6   | 0.13 | 249.67 | 247 |
| [20, 100]             | 8  | Nadam | relu    | 0.6039 | 0.01162 | 278 | 0.8875 | 0.03244 | 235 | 0.5717 | 0.03716 | 239 | 17.4  | 0.18 | 250.67 | 248 |
| [80, 80, 40, 40]      | 8  | adam  | tanh    | 0.5945 | 0.01136 | 210 | 0.8921 | 0.02774 | 273 | 0.5678 | 0.02875 | 272 | 26.42 | 0.15 | 251.67 | 249 |
| [100, 80, 60, 40, 20] | 32 | Nadam | tanh    | 0.5974 | 0.01218 | 234 | 0.8901 | 0.02697 | 261 | 0.5696 | 0.03037 | 261 | 11.2  | 0.32 | 252    | 250 |
| [80, 80, 40, 40]      | 16 | Nadam | tanh    | 0.5959 | 0.01253 | 224 | 0.8914 | 0.02923 | 267 | 0.5682 | 0.0289  | 268 | 16.36 | 0.28 | 253    | 251 |
| [40]                  | 16 | Nadam | tanh    | 0.5986 | 0.0135  | 245 | 0.8896 | 0.02526 | 257 | 0.5701 | 0.02865 | 257 | 10.84 | 0.14 | 253    | 252 |
| [40, 60, 80]          | 16 | Nadam | tanh    | 0.6028 | 0.01746 | 275 | 0.888  | 0.03403 | 241 | 0.5712 | 0.03494 | 243 | 12.92 | 0.4  | 253    | 253 |
| [100, 80, 60, 40, 20] | 32 | adam  | tanh    | 0.5974 | 0.0114  | 233 | 0.8912 | 0.02647 | 266 | 0.5688 | 0.02726 | 264 | 9.66  | 0.12 | 254.33 | 254 |
| [80]                  | 8  | sgd   | relu    | 0.6144 | 0.01444 | 344 | 0.8855 | 0.02836 | 213 | 0.5749 | 0.02229 | 206 | 18.65 | 0.12 | 254.33 | 255 |
| [60, 40, 20]          | 8  | Nadam | sigmoid | 0.6    | 0.01489 | 256 | 0.8892 | 0.03044 | 253 | 0.5701 | 0.03353 | 258 | 27.79 | 0.26 | 255.67 | 256 |
| [60, 40, 20]          | 32 | Nadam | tanh    | 0.5995 | 0.01026 | 251 | 0.8896 | 0.02973 | 258 | 0.5697 | 0.03337 | 260 | 8.65  | 0.24 | 256.33 | 257 |
| [100]                 | 8  | sgd   | relu    | 0.6191 | 0.01249 | 370 | 0.8847 | 0.02307 | 207 | 0.5751 | 0.02629 | 202 | 20.18 | 0.26 | 259.67 | 258 |
| [80, 60, 80, 40]      | 8  | adam  | tanh    | 0.5963 | 0.0146  | 227 | 0.8925 | 0.03321 | 276 | 0.5669 | 0.03437 | 278 | 26.79 | 0.39 | 260.33 | 259 |
| [80, 80, 40, 40]      | 16 | Nadam | sigmoid | 0.5997 | 0.01439 | 255 | 0.8907 | 0.03088 | 263 | 0.569  | 0.03241 | 263 | 16.45 | 0.31 | 260.33 | 260 |
| [60, 20]              | 8  | adam  | sigmoid | 0.5978 | 0.01876 | 239 | 0.892  | 0.03592 | 272 | 0.5677 | 0.03712 | 273 | 23.89 | 0.16 | 261.33 | 261 |
| [60, 60]              | 8  | Nadam | sigmoid | 0.5989 | 0.01532 | 247 | 0.8916 | 0.0343  | 269 | 0.5677 | 0.03692 | 274 | 27.17 | 0.85 | 263.33 | 262 |
| [100, 60]             | 16 | adam  | sigmoid | 0.5984 | 0.01445 | 243 | 0.8921 | 0.03024 | 274 | 0.5672 | 0.03439 | 276 | 14.75 | 0.19 | 264.33 | 263 |
| [60, 60]              | 32 | Nadam | tanh    | 0.6007 | 0.01781 | 258 | 0.8916 | 0.03084 | 268 | 0.5682 | 0.03269 | 267 | 8.45  | 0.26 | 264.33 | 264 |
| [80, 80, 40, 40]      | 32 | adam  | tanh    | 0.6022 | 0.01164 | 273 | 0.8906 | 0.02649 | 262 | 0.5687 | 0.03317 | 266 | 8.01  | 0.09 | 267    | 265 |
| [20, 100]             | 32 | Nadam | relu    | 0.6062 | 0.01338 | 293 | 0.8893 | 0.02907 | 255 | 0.5705 | 0.03092 | 253 | 5.97  | 0.03 | 267    | 266 |
| [100, 80, 60, 40, 20] | 8  | adam  | tanh    | 0.5926 | 0.00807 | 196 | 0.8962 | 0.02245 | 305 | 0.5638 | 0.02613 | 304 | 29.82 | 0.32 | 268.33 | 267 |
| [40, 80]              | 8  | adam  | tanh    | 0.5981 | 0.0133  | 240 | 0.8931 | 0.03164 | 283 | 0.5663 | 0.03314 | 284 | 20.33 | 0.73 | 269    | 268 |
| [100, 100]            | 16 | adam  | sigmoid | 0.6007 | 0.01557 | 259 | 0.8926 | 0.032   | 277 | 0.5668 | 0.0345  | 279 | 14.89 | 0.1  | 271.67 | 269 |
| [80, 80, 80, 80]      | 16 | Nadam | tanh    | 0.5991 | 0.01645 | 248 | 0.8938 | 0.03618 | 288 | 0.566  | 0.03449 | 286 | 16.54 | 0.24 | 274    | 270 |
| [100, 100]            | 8  | sgd   | relu    | 0.6206 | 0.01735 | 376 | 0.887  | 0.02944 | 229 | 0.5733 | 0.02549 | 219 | 22.34 | 1.38 | 274.67 | 271 |
| [80, 80, 80, 80]      | 16 | adam  | tanh    | 0.6009 | 0.01211 | 265 | 0.8929 | 0.02596 | 279 | 0.5667 | 0.02935 | 281 | 14.4  | 0.14 | 275    | 272 |
| [80, 60, 80, 40]      | 16 | adam  | tanh    | 0.5997 | 0.01442 | 254 | 0.8938 | 0.03129 | 287 | 0.566  | 0.02984 | 287 | 14.46 | 0.33 | 276    | 273 |
| [100, 100]            | 16 | Nadam | sigmoid | 0.6009 | 0.01532 | 264 | 0.8931 | 0.02832 | 282 | 0.5667 | 0.03117 | 282 | 16.6  | 0.07 | 276    | 274 |



|                       |    |       |         |        |         |     |        |         |     |        |         |     |       |       |        |     |
|-----------------------|----|-------|---------|--------|---------|-----|--------|---------|-----|--------|---------|-----|-------|-------|--------|-----|
| [80, 80, 40, 40]      | 32 | Nadam | tanh    | 0.6008 | 0.01369 | 261 | 0.8933 | 0.0312  | 284 | 0.5661 | 0.03427 | 285 | 9.43  | 0.25  | 276.67 | 275 |
| [100, 60, 40]         | 8  | sgd   | relu    | 0.6155 | 0.01714 | 352 | 0.8879 | 0.02874 | 238 | 0.5717 | 0.03343 | 240 | 23.51 | 1.2   | 276.67 | 276 |
| [60]                  | 8  | adam  | sigmoid | 0.6008 | 0.01577 | 263 | 0.8935 | 0.03082 | 285 | 0.5665 | 0.0297  | 283 | 23.15 | 0.33  | 277    | 277 |
| [60]                  | 8  | sgd   | relu    | 0.6151 | 0.01554 | 351 | 0.8884 | 0.03084 | 246 | 0.5721 | 0.02576 | 235 | 17.86 | 0.5   | 277.33 | 278 |
| [80, 40]              | 8  | sgd   | relu    | 0.6181 | 0.02079 | 363 | 0.8877 | 0.03061 | 237 | 0.5724 | 0.03069 | 232 | 20.6  | 0.18  | 277.33 | 279 |
| [60, 40, 20]          | 8  | adam  | tanh    | 0.5957 | 0.01429 | 223 | 0.896  | 0.02633 | 304 | 0.5636 | 0.03254 | 306 | 24.76 | 0.45  | 277.67 | 280 |
| [20, 100]             | 32 | adam  | relu    | 0.6039 | 0.01525 | 279 | 0.893  | 0.032   | 281 | 0.5673 | 0.03191 | 275 | 5.17  | 0.24  | 278.33 | 281 |
| [80, 60, 80, 40]      | 32 | adam  | tanh    | 0.6039 | 0.01446 | 280 | 0.8927 | 0.03088 | 278 | 0.5667 | 0.0311  | 280 | 8.15  | 0.16  | 279.33 | 282 |
| [80, 40, 60]          | 8  | sgd   | relu    | 0.6175 | 0.01751 | 360 | 0.8883 | 0.03752 | 243 | 0.5718 | 0.03411 | 236 | 27.32 | 11.36 | 279.67 | 283 |
| [80, 80, 80, 80]      | 32 | adam  | tanh    | 0.6048 | 0.00862 | 287 | 0.8929 | 0.02169 | 280 | 0.5669 | 0.02511 | 277 | 8.28  | 0.22  | 281.33 | 284 |
| [60, 20]              | 8  | Nadam | sigmoid | 0.5996 | 0.01219 | 252 | 0.8954 | 0.02885 | 299 | 0.5646 | 0.03059 | 298 | 26.58 | 0.34  | 283    | 285 |
| [40, 60, 80]          | 8  | adam  | tanh    | 0.6011 | 0.01354 | 267 | 0.894  | 0.03534 | 289 | 0.5653 | 0.03817 | 295 | 21.84 | 0.33  | 283.67 | 286 |
| [80, 60, 80, 40]      | 16 | Nadam | sigmoid | 0.6043 | 0.01874 | 286 | 0.8936 | 0.03056 | 286 | 0.5656 | 0.03577 | 292 | 16.37 | 0.13  | 288    | 287 |
| [60]                  | 32 | adam  | tanh    | 0.602  | 0.01428 | 271 | 0.8953 | 0.03363 | 298 | 0.5643 | 0.03348 | 299 | 6.82  | 0.07  | 289.33 | 288 |
| [60, 40, 20]          | 8  | adam  | sigmoid | 0.601  | 0.01282 | 266 | 0.8956 | 0.02809 | 302 | 0.5639 | 0.03437 | 302 | 24.83 | 0.58  | 290    | 289 |
| [40, 80]              | 16 | Nadam | tanh    | 0.6043 | 0.01641 | 285 | 0.8944 | 0.031   | 292 | 0.5653 | 0.03381 | 294 | 12.11 | 0.23  | 290.33 | 290 |
| [80, 80, 80, 80]      | 16 | adam  | sigmoid | 0.604  | 0.01238 | 282 | 0.8946 | 0.03624 | 295 | 0.5651 | 0.03338 | 296 | 14.34 | 0.3   | 291    | 291 |
| [40, 60, 80]          | 8  | Nadam | tanh    | 0.6021 | 0.01316 | 272 | 0.8955 | 0.03001 | 301 | 0.5639 | 0.0349  | 301 | 24.05 | 0.85  | 291.33 | 292 |
| [40, 60, 80]          | 8  | adam  | sigmoid | 0.6065 | 0.01985 | 296 | 0.894  | 0.03726 | 290 | 0.5654 | 0.03878 | 293 | 21.02 | 0.28  | 293    | 293 |
| [20, 20]              | 16 | adam  | relu    | 0.6073 | 0.01765 | 303 | 0.8942 | 0.03546 | 291 | 0.5658 | 0.0346  | 289 | 8.82  | 0.12  | 294.33 | 294 |
| [60, 40, 20]          | 8  | sgd   | relu    | 0.6223 | 0.01695 | 383 | 0.8886 | 0.03183 | 249 | 0.5705 | 0.03583 | 251 | 20.59 | 0.23  | 294.33 | 295 |
| [60]                  | 32 | Nadam | tanh    | 0.6007 | 0.01483 | 260 | 0.8973 | 0.03196 | 313 | 0.5626 | 0.03047 | 313 | 7.74  | 0.06  | 295.33 | 296 |
| [80, 80, 80, 80]      | 8  | adam  | tanh    | 0.6014 | 0.01205 | 268 | 0.8969 | 0.02934 | 310 | 0.5633 | 0.02658 | 308 | 26.66 | 0.33  | 295.33 | 297 |
| [80, 80]              | 16 | adam  | sigmoid | 0.6039 | 0.0159  | 281 | 0.8959 | 0.03125 | 303 | 0.5638 | 0.03421 | 303 | 13.6  | 0.27  | 295.67 | 298 |
| [40]                  | 8  | sgd   | relu    | 0.6198 | 0.01637 | 373 | 0.89   | 0.03026 | 260 | 0.5705 | 0.02724 | 254 | 15.25 | 0.36  | 295.67 | 299 |
| [20, 20]              | 16 | Nadam | relu    | 0.6077 | 0.0081  | 306 | 0.8945 | 0.0237  | 294 | 0.5659 | 0.02206 | 288 | 10.01 | 0.24  | 296    | 300 |
| [80, 80, 40, 40]      | 16 | adam  | tanh    | 0.6017 | 0.0095  | 269 | 0.8969 | 0.02352 | 309 | 0.5629 | 0.02312 | 312 | 14.13 | 0.14  | 296.67 | 301 |
| [60]                  | 8  | Nadam | sigmoid | 0.6029 | 0.01303 | 276 | 0.8965 | 0.02779 | 307 | 0.5633 | 0.03122 | 309 | 25.44 | 0.23  | 297.33 | 302 |
| [100, 80, 60, 40, 20] | 16 | Nadam | sigmoid | 0.6074 | 0.01226 | 305 | 0.8952 | 0.03361 | 297 | 0.5648 | 0.03568 | 297 | 18.66 | 0.23  | 299.67 | 303 |
| [40, 40]              | 32 | Nadam | tanh    | 0.6055 | 0.01405 | 290 | 0.8964 | 0.02866 | 306 | 0.5634 | 0.02934 | 307 | 6.82  | 0.25  | 301    | 304 |
| [60, 60]              | 8  | sgd   | relu    | 0.6225 | 0.01921 | 384 | 0.8911 | 0.03401 | 265 | 0.569  | 0.03196 | 262 | 19.56 | 0.37  | 303.67 | 305 |

|                  |    |       |         |        |         |     |        |         |     |        |         |     |       |       |        |     |
|------------------|----|-------|---------|--------|---------|-----|--------|---------|-----|--------|---------|-----|-------|-------|--------|-----|
| [20, 20]         | 16 | adam  | tanh    | 0.6095 | 0.01005 | 315 | 0.8954 | 0.0258  | 300 | 0.5643 | 0.02716 | 300 | 8.95  | 0.14  | 305    | 306 |
| [40]             | 32 | adam  | tanh    | 0.6052 | 0.01621 | 289 | 0.8981 | 0.03251 | 315 | 0.5617 | 0.03217 | 314 | 5.68  | 0.21  | 306    | 307 |
| [80, 80, 40, 40] | 8  | sgd   | relu    | 0.6219 | 0.02647 | 380 | 0.8917 | 0.032   | 270 | 0.568  | 0.03433 | 271 | 73.22 | 7.86  | 307    | 308 |
| [40, 40]         | 32 | adam  | tanh    | 0.6071 | 0.01588 | 302 | 0.8969 | 0.03239 | 311 | 0.5632 | 0.03157 | 310 | 5.94  | 0.18  | 307.67 | 309 |
| [40, 80]         | 8  | Nadam | sigmoid | 0.6051 | 0.01191 | 288 | 0.8984 | 0.02611 | 318 | 0.5614 | 0.03097 | 319 | 23.09 | 0.81  | 308.33 | 310 |
| [80, 80, 80, 80] | 8  | Nadam | tanh    | 0.6041 | 0.02044 | 283 | 0.8997 | 0.03994 | 320 | 0.5598 | 0.03998 | 325 | 30.27 | 0.22  | 309.33 | 311 |
| [100, 60, 40]    | 16 | adam  | sigmoid | 0.6081 | 0.00921 | 308 | 0.897  | 0.02971 | 312 | 0.5629 | 0.03076 | 311 | 15.2  | 0.18  | 310.33 | 312 |
| [40, 80, 80, 40] | 8  | adam  | sigmoid | 0.607  | 0.01699 | 301 | 0.898  | 0.03343 | 314 | 0.5616 | 0.03366 | 317 | 22.45 | 0.62  | 310.67 | 313 |
| [40, 60, 80]     | 32 | adam  | tanh    | 0.6119 | 0.0105  | 323 | 0.8966 | 0.01892 | 308 | 0.5636 | 0.02385 | 305 | 6.45  | 0.14  | 312    | 314 |
| [80, 60, 80, 40] | 8  | sgd   | relu    | 0.624  | 0.0133  | 393 | 0.8925 | 0.02793 | 275 | 0.5681 | 0.02707 | 270 | 65.91 | 12.99 | 312.67 | 315 |
| [40]             | 8  | adam  | sigmoid | 0.6064 | 0.01381 | 295 | 0.8999 | 0.03094 | 323 | 0.56   | 0.03224 | 323 | 19.7  | 0.18  | 313.67 | 316 |
| [100, 60]        | 16 | Nadam | sigmoid | 0.6043 | 0.01315 | 284 | 0.901  | 0.02896 | 330 | 0.559  | 0.03109 | 329 | 16.65 | 0.18  | 314.33 | 317 |
| [20]             | 8  | adam  | tanh    | 0.6091 | 0.0164  | 312 | 0.8982 | 0.02923 | 317 | 0.5617 | 0.03276 | 316 | 14.58 | 0.15  | 315    | 318 |
| [40, 40]         | 8  | Nadam | sigmoid | 0.6068 | 0.0153  | 298 | 0.9002 | 0.03165 | 325 | 0.5596 | 0.03331 | 326 | 23.02 | 0.52  | 316.33 | 319 |
| [40, 80]         | 8  | adam  | sigmoid | 0.6069 | 0.01729 | 299 | 0.9005 | 0.03247 | 326 | 0.5594 | 0.0365  | 328 | 20.61 | 0.72  | 317.67 | 320 |
| [40, 80]         | 32 | Nadam | tanh    | 0.6088 | 0.01483 | 310 | 0.8998 | 0.02532 | 322 | 0.5604 | 0.02826 | 321 | 6.7   | 0.1   | 317.67 | 321 |
| [40, 60, 80]     | 32 | Nadam | tanh    | 0.612  | 0.01205 | 326 | 0.8981 | 0.02617 | 316 | 0.5617 | 0.03223 | 315 | 7.13  | 0.28  | 319    | 322 |
| [40]             | 32 | Nadam | tanh    | 0.606  | 0.01232 | 292 | 0.9016 | 0.02627 | 336 | 0.5584 | 0.02716 | 335 | 5.97  | 0.11  | 321    | 323 |
| [80, 40]         | 16 | adam  | sigmoid | 0.6062 | 0.01344 | 294 | 0.9015 | 0.02988 | 334 | 0.5583 | 0.03278 | 336 | 13.61 | 0.37  | 321.33 | 324 |
| [20]             | 16 | adam  | relu    | 0.6122 | 0.01506 | 328 | 0.8988 | 0.03397 | 319 | 0.5614 | 0.03352 | 318 | 8.31  | 0.16  | 321.67 | 325 |
| [80, 80]         | 16 | Nadam | sigmoid | 0.607  | 0.01731 | 300 | 0.9015 | 0.03038 | 335 | 0.5585 | 0.03245 | 333 | 15.81 | 0.71  | 322.67 | 326 |
| [40, 80, 80, 40] | 16 | Nadam | sigmoid | 0.611  | 0.01711 | 317 | 0.9005 | 0.03517 | 328 | 0.5594 | 0.0351  | 327 | 13.55 | 0.35  | 324    | 327 |
| [40, 80]         | 8  | sgd   | relu    | 0.6234 | 0.01622 | 391 | 0.8944 | 0.02802 | 293 | 0.5657 | 0.03149 | 290 | 17.83 | 0.7   | 324.67 | 328 |
| [40, 80, 80, 40] | 32 | Nadam | tanh    | 0.6113 | 0.00942 | 322 | 0.9011 | 0.02368 | 331 | 0.5589 | 0.02617 | 330 | 7.45  | 0.26  | 327.67 | 329 |
| [40, 60, 80]     | 16 | adam  | tanh    | 0.6111 | 0.01207 | 319 | 0.9014 | 0.02718 | 333 | 0.5585 | 0.03006 | 334 | 11.56 | 0.37  | 328.67 | 330 |
| [40]             | 8  | Nadam | sigmoid | 0.6073 | 0.01181 | 304 | 0.904  | 0.03    | 344 | 0.5561 | 0.03046 | 340 | 21.41 | 0.35  | 329.33 | 331 |
| [40, 80, 80, 40] | 16 | Nadam | tanh    | 0.6091 | 0.01467 | 311 | 0.9022 | 0.0332  | 338 | 0.5579 | 0.03376 | 339 | 13.26 | 0.19  | 329.33 | 332 |
| [40, 60, 80]     | 8  | Nadam | sigmoid | 0.6094 | 0.00905 | 314 | 0.9021 | 0.02279 | 337 | 0.5582 | 0.02474 | 337 | 24.66 | 0.62  | 329.33 | 333 |
| [60, 20]         | 8  | sgd   | relu    | 0.6265 | 0.00813 | 402 | 0.8948 | 0.02396 | 296 | 0.5657 | 0.02129 | 291 | 19.58 | 0.08  | 329.67 | 334 |
| [80, 40, 60]     | 16 | adam  | sigmoid | 0.6077 | 0.01137 | 307 | 0.9038 | 0.02862 | 341 | 0.556  | 0.03378 | 342 | 14.08 | 0.21  | 330    | 335 |
| [20, 20]         | 8  | Nadam | relu    | 0.615  | 0.01321 | 350 | 0.8998 | 0.02886 | 321 | 0.5603 | 0.03263 | 322 | 16.99 | 0.18  | 331    | 336 |

|                  |    |       |         |        |         |     |        |         |     |        |         |     |       |      |        |     |
|------------------|----|-------|---------|--------|---------|-----|--------|---------|-----|--------|---------|-----|-------|------|--------|-----|
| [80, 40]         | 16 | Nadam | sigmoid | 0.6092 | 0.01445 | 313 | 0.9037 | 0.03127 | 340 | 0.5561 | 0.03394 | 341 | 15.27 | 0.16 | 331.33 | 337 |
| [40, 40]         | 8  | adam  | sigmoid | 0.6085 | 0.01812 | 309 | 0.904  | 0.032   | 343 | 0.556  | 0.03374 | 343 | 20.05 | 0.8  | 331.67 | 338 |
| [20]             | 8  | Nadam | tanh    | 0.6113 | 0.01892 | 321 | 0.9023 | 0.03194 | 339 | 0.5581 | 0.02983 | 338 | 15.89 | 0.16 | 332.67 | 339 |
| [100, 60, 40]    | 16 | Nadam | sigmoid | 0.6067 | 0.01632 | 297 | 0.9055 | 0.03299 | 351 | 0.5543 | 0.03562 | 354 | 17.18 | 0.06 | 334    | 340 |
| [80, 60, 80, 40] | 16 | adam  | sigmoid | 0.6108 | 0.01372 | 316 | 0.904  | 0.02992 | 342 | 0.5559 | 0.03179 | 344 | 14.25 | 0.16 | 334    | 341 |
| [40, 80, 80, 40] | 32 | adam  | tanh    | 0.614  | 0.01597 | 341 | 0.901  | 0.03415 | 329 | 0.5587 | 0.03585 | 332 | 6.74  | 0.25 | 334    | 342 |
| [20]             | 8  | adam  | relu    | 0.6146 | 0.01515 | 345 | 0.9014 | 0.02809 | 332 | 0.5587 | 0.03276 | 331 | 17.78 | 6.02 | 336    | 343 |
| [20, 20]         | 8  | Nadam | tanh    | 0.6111 | 0.01675 | 318 | 0.9045 | 0.037   | 345 | 0.5553 | 0.0384  | 347 | 17.19 | 0.33 | 336.67 | 344 |
| [60, 60]         | 16 | adam  | sigmoid | 0.612  | 0.016   | 325 | 0.9048 | 0.03286 | 347 | 0.5552 | 0.03388 | 348 | 12.87 | 0.13 | 340    | 345 |
| [20, 20]         | 8  | adam  | tanh    | 0.6124 | 0.01002 | 331 | 0.9048 | 0.02419 | 346 | 0.5556 | 0.02736 | 346 | 15.49 | 0.25 | 341    | 346 |
| [20, 20]         | 32 | Nadam | relu    | 0.6129 | 0.01625 | 332 | 0.9049 | 0.03345 | 349 | 0.5551 | 0.03621 | 349 | 5.77  | 0.11 | 343.33 | 347 |
| [80, 80, 80, 80] | 16 | Nadam | sigmoid | 0.6133 | 0.01642 | 336 | 0.9048 | 0.03224 | 348 | 0.5548 | 0.03599 | 350 | 16.46 | 0.17 | 344.67 | 348 |
| [20]             | 16 | adam  | tanh    | 0.612  | 0.01029 | 324 | 0.9063 | 0.02853 | 355 | 0.5539 | 0.02784 | 356 | 8.53  | 0.32 | 345    | 349 |
| [40, 80, 80, 40] | 8  | adam  | tanh    | 0.6122 | 0.01955 | 329 | 0.9063 | 0.04104 | 357 | 0.5535 | 0.04009 | 357 | 22.39 | 0.27 | 347.67 | 350 |
| [20, 100]        | 8  | adam  | tanh    | 0.6134 | 0.01283 | 339 | 0.9057 | 0.0296  | 354 | 0.5543 | 0.0311  | 353 | 15.78 | 0.08 | 348.67 | 351 |
| [100, 100]       | 16 | sgd   | relu    | 0.6281 | 0.01432 | 407 | 0.9    | 0.0252  | 324 | 0.5606 | 0.02346 | 320 | 24.23 | 14.2 | 350.33 | 352 |
| [20, 20]         | 32 | adam  | tanh    | 0.6167 | 0.01113 | 357 | 0.9055 | 0.02373 | 352 | 0.5545 | 0.03012 | 352 | 5.01  | 0.12 | 353.67 | 353 |
| [20]             | 16 | Nadam | tanh    | 0.6141 | 0.01515 | 342 | 0.9068 | 0.03378 | 361 | 0.5532 | 0.0336  | 361 | 9.13  | 0.2  | 354.67 | 354 |
| [20, 20]         | 8  | sgd   | relu    | 0.6295 | 0.01428 | 413 | 0.9005 | 0.02492 | 327 | 0.5599 | 0.02694 | 324 | 13.64 | 0.15 | 354.67 | 355 |
| [20, 100]        | 8  | Nadam | tanh    | 0.6132 | 0.01203 | 334 | 0.9076 | 0.02807 | 365 | 0.5524 | 0.03212 | 366 | 17.43 | 0.48 | 355    | 356 |
| [60, 20]         | 16 | adam  | sigmoid | 0.6132 | 0.01626 | 333 | 0.9087 | 0.03319 | 369 | 0.5511 | 0.03681 | 369 | 12.76 | 0.23 | 357    | 357 |
| [40, 80, 80, 40] | 16 | adam  | tanh    | 0.616  | 0.01613 | 354 | 0.9064 | 0.03186 | 358 | 0.5532 | 0.03823 | 360 | 11.7  | 0.42 | 357.33 | 358 |
| [20, 20]         | 16 | Nadam | tanh    | 0.6164 | 0.01509 | 356 | 0.9065 | 0.03006 | 359 | 0.5534 | 0.03642 | 358 | 10.17 | 0.26 | 357.67 | 359 |
| [80, 80, 40, 40] | 32 | Nadam | sigmoid | 0.6134 | 0.01503 | 338 | 0.9086 | 0.02568 | 368 | 0.5512 | 0.03202 | 368 | 9.36  | 0.11 | 358    | 360 |
| [20]             | 16 | Nadam | relu    | 0.6187 | 0.0166  | 364 | 0.9063 | 0.03783 | 356 | 0.554  | 0.03462 | 355 | 8.99  | 0.06 | 358.33 | 361 |
| [20]             | 32 | Nadam | relu    | 0.6195 | 0.01577 | 372 | 0.9056 | 0.02928 | 353 | 0.5546 | 0.03305 | 351 | 5.29  | 0.17 | 358.67 | 362 |
| [100]            | 16 | adam  | sigmoid | 0.6122 | 0.01627 | 330 | 0.9105 | 0.03414 | 374 | 0.5496 | 0.03444 | 374 | 14.39 | 0.34 | 359.33 | 363 |
| [40, 80, 80, 40] | 16 | adam  | sigmoid | 0.6168 | 0.01454 | 358 | 0.9071 | 0.03208 | 362 | 0.5529 | 0.03302 | 363 | 11.53 | 0.15 | 361    | 364 |
| [80, 40, 60]     | 16 | Nadam | sigmoid | 0.6138 | 0.01729 | 340 | 0.9104 | 0.03469 | 373 | 0.5496 | 0.03583 | 373 | 15.93 | 0.23 | 362    | 365 |
| [40, 80]         | 32 | adam  | tanh    | 0.617  | 0.01729 | 359 | 0.9072 | 0.03402 | 363 | 0.5528 | 0.03397 | 364 | 6.21  | 0.12 | 362    | 366 |
| [60, 40, 20]     | 16 | Nadam | sigmoid | 0.6149 | 0.01417 | 348 | 0.9096 | 0.03091 | 370 | 0.5504 | 0.03404 | 370 | 14.9  | 0.11 | 362.67 | 367 |

|                  |    |       |         |        |         |     |        |         |     |        |         |     |       |       |        |     |
|------------------|----|-------|---------|--------|---------|-----|--------|---------|-----|--------|---------|-----|-------|-------|--------|-----|
| [60, 20]         | 16 | Nadam | sigmoid | 0.6133 | 0.01543 | 335 | 0.9115 | 0.03289 | 379 | 0.5487 | 0.03457 | 379 | 14.19 | 0.14  | 364.33 | 368 |
| [40, 60, 80]     | 16 | Nadam | sigmoid | 0.6143 | 0.01637 | 343 | 0.9106 | 0.03677 | 376 | 0.5492 | 0.03716 | 377 | 12.71 | 0.35  | 365.33 | 369 |
| [60, 60]         | 16 | Nadam | sigmoid | 0.6147 | 0.01633 | 346 | 0.9106 | 0.03243 | 375 | 0.5493 | 0.03567 | 376 | 14.4  | 0.28  | 365.67 | 370 |
| [20]             | 32 | adam  | tanh    | 0.6149 | 0.01239 | 349 | 0.9107 | 0.03099 | 377 | 0.5494 | 0.03048 | 375 | 4.68  | 0.06  | 367    | 371 |
| [60, 40, 20]     | 16 | adam  | sigmoid | 0.6148 | 0.01557 | 347 | 0.9121 | 0.03301 | 381 | 0.5483 | 0.03271 | 381 | 13.12 | 0.19  | 369.67 | 372 |
| [100]            | 16 | Nadam | sigmoid | 0.6159 | 0.01566 | 353 | 0.9137 | 0.03178 | 384 | 0.5463 | 0.03248 | 384 | 15.62 | 0.18  | 373.67 | 373 |
| [20, 100]        | 16 | adam  | tanh    | 0.6226 | 0.01275 | 385 | 0.9103 | 0.02226 | 372 | 0.5501 | 0.02745 | 371 | 9.54  | 0.21  | 376    | 374 |
| [20, 20]         | 32 | adam  | relu    | 0.6191 | 0.02251 | 369 | 0.9125 | 0.04018 | 382 | 0.5474 | 0.0419  | 382 | 5.09  | 0.05  | 377.67 | 375 |
| [40, 40]         | 16 | adam  | sigmoid | 0.6179 | 0.0162  | 361 | 0.9151 | 0.03178 | 387 | 0.5451 | 0.03374 | 388 | 10.65 | 0.35  | 378.67 | 376 |
| [80, 80]         | 16 | sgd   | relu    | 0.6361 | 0.01612 | 441 | 0.905  | 0.01926 | 350 | 0.5556 | 0.0242  | 345 | 38.38 | 2.43  | 378.67 | 377 |
| [40, 60, 80]     | 8  | sgd   | relu    | 0.6298 | 0.02475 | 418 | 0.9065 | 0.02991 | 360 | 0.5533 | 0.0389  | 359 | 18.52 | 0.27  | 379    | 378 |
| [80, 80, 40, 40] | 32 | adam  | sigmoid | 0.6204 | 0.01123 | 374 | 0.9131 | 0.02764 | 383 | 0.5472 | 0.03204 | 383 | 8.05  | 0.06  | 380    | 379 |
| [20]             | 32 | adam  | relu    | 0.6222 | 0.01795 | 382 | 0.9118 | 0.03323 | 380 | 0.5485 | 0.03211 | 380 | 4.81  | 0.12  | 380.67 | 380 |
| [40, 80]         | 16 | adam  | sigmoid | 0.6163 | 0.01357 | 355 | 0.9163 | 0.03098 | 394 | 0.544  | 0.03213 | 395 | 11.18 | 0.1   | 381.33 | 381 |
| [20, 100]        | 8  | adam  | sigmoid | 0.6189 | 0.01058 | 367 | 0.9156 | 0.02677 | 390 | 0.5446 | 0.03132 | 391 | 15.67 | 0.19  | 382.67 | 382 |
| [40, 40]         | 16 | Nadam | sigmoid | 0.6188 | 0.01294 | 366 | 0.9162 | 0.03145 | 393 | 0.5438 | 0.03366 | 396 | 11.59 | 0.18  | 385    | 383 |
| [40, 60, 80]     | 16 | adam  | sigmoid | 0.622  | 0.01619 | 381 | 0.9154 | 0.03055 | 389 | 0.5446 | 0.03487 | 390 | 11.24 | 0.27  | 386.67 | 384 |
| [20, 20]         | 8  | Nadam | sigmoid | 0.618  | 0.01567 | 362 | 0.9179 | 0.03475 | 400 | 0.5424 | 0.03534 | 400 | 17.24 | 0.25  | 387.33 | 385 |
| [80, 40, 60]     | 16 | sgd   | relu    | 0.6337 | 0.0156  | 433 | 0.908  | 0.02661 | 366 | 0.5526 | 0.02983 | 365 | 11.12 | 0.08  | 388    | 386 |
| [80, 40]         | 16 | sgd   | relu    | 0.6354 | 0.02135 | 438 | 0.9075 | 0.0294  | 364 | 0.5531 | 0.02901 | 362 | 11.67 | 0.32  | 388    | 387 |
| [80]             | 16 | adam  | sigmoid | 0.6191 | 0.01254 | 368 | 0.9172 | 0.02714 | 399 | 0.543  | 0.0306  | 399 | 12.98 | 0.28  | 388.67 | 388 |
| [20, 20]         | 32 | Nadam | tanh    | 0.6195 | 0.01483 | 371 | 0.9167 | 0.02834 | 397 | 0.5434 | 0.03212 | 398 | 5.82  | 0.06  | 388.67 | 389 |
| [20]             | 8  | Nadam | sigmoid | 0.6188 | 0.01286 | 365 | 0.9188 | 0.02919 | 402 | 0.5414 | 0.03283 | 402 | 15.91 | 0.15  | 389.67 | 390 |
| [20, 100]        | 16 | Nadam | tanh    | 0.6255 | 0.01583 | 397 | 0.9149 | 0.03023 | 386 | 0.5454 | 0.03255 | 387 | 10.45 | 0.23  | 390    | 391 |
| [40, 80, 80, 40] | 8  | sgd   | relu    | 0.6337 | 0.03138 | 432 | 0.9098 | 0.03134 | 371 | 0.5499 | 0.03934 | 372 | 50.28 | 12.76 | 391.67 | 392 |
| [100, 60]        | 16 | sgd   | relu    | 0.6363 | 0.02716 | 442 | 0.9084 | 0.03831 | 367 | 0.5523 | 0.03105 | 367 | 12.34 | 0.12  | 392    | 393 |
| [60]             | 16 | adam  | sigmoid | 0.6206 | 0.01495 | 375 | 0.9183 | 0.03332 | 401 | 0.5417 | 0.03543 | 401 | 12.31 | 0.11  | 392.33 | 394 |
| [80, 60, 80, 40] | 32 | Nadam | sigmoid | 0.6231 | 0.01629 | 389 | 0.9162 | 0.03545 | 392 | 0.5437 | 0.0376  | 397 | 9.33  | 0.25  | 392.67 | 395 |
| [20]             | 8  | adam  | sigmoid | 0.6208 | 0.01227 | 377 | 0.9198 | 0.03097 | 404 | 0.5405 | 0.03156 | 405 | 14.69 | 0.28  | 395.33 | 396 |
| [40, 80, 80, 40] | 32 | adam  | sigmoid | 0.6262 | 0.01065 | 400 | 0.9163 | 0.021   | 395 | 0.544  | 0.02672 | 394 | 6.59  | 0.25  | 396.33 | 397 |
| [20, 20]         | 8  | adam  | sigmoid | 0.6226 | 0.01483 | 386 | 0.9198 | 0.03294 | 405 | 0.5403 | 0.03477 | 406 | 15.54 | 0.2   | 399    | 398 |

|                       |    |       |         |        |         |     |        |         |     |        |         |     |       |      |        |     |
|-----------------------|----|-------|---------|--------|---------|-----|--------|---------|-----|--------|---------|-----|-------|------|--------|-----|
| [80]                  | 16 | Nadam | sigmoid | 0.6229 | 0.01527 | 387 | 0.9206 | 0.03393 | 408 | 0.5397 | 0.03294 | 409 | 14.24 | 0.38 | 401.33 | 399 |
| [100, 60, 40]         | 16 | sgd   | relu    | 0.6415 | 0.02533 | 448 | 0.9113 | 0.03597 | 378 | 0.549  | 0.03844 | 378 | 12.54 | 0.38 | 401.33 | 400 |
| [20, 100]             | 32 | Nadam | tanh    | 0.6248 | 0.01769 | 395 | 0.9203 | 0.03144 | 407 | 0.5401 | 0.02938 | 408 | 5.94  | 0.14 | 403.33 | 401 |
| [80, 80, 80, 80]      | 32 | adam  | sigmoid | 0.6245 | 0.0151  | 394 | 0.9207 | 0.03392 | 409 | 0.539  | 0.03621 | 410 | 8.34  | 0.12 | 404.33 | 402 |
| [100]                 | 16 | sgd   | relu    | 0.6366 | 0.01429 | 443 | 0.9146 | 0.02321 | 385 | 0.5461 | 0.02547 | 385 | 16.75 | 7.28 | 404.33 | 403 |
| [40, 80]              | 16 | Nadam | sigmoid | 0.6213 | 0.01165 | 379 | 0.9227 | 0.03001 | 418 | 0.5376 | 0.03196 | 419 | 12.07 | 0.35 | 405.33 | 404 |
| [100, 100]            | 32 | adam  | sigmoid | 0.6234 | 0.01376 | 390 | 0.922  | 0.03079 | 413 | 0.5385 | 0.03125 | 413 | 8.88  | 0.24 | 405.33 | 405 |
| [60, 40, 20]          | 32 | adam  | sigmoid | 0.6229 | 0.01435 | 388 | 0.9225 | 0.02975 | 417 | 0.538  | 0.03214 | 415 | 7.7   | 0.21 | 406.67 | 406 |
| [20, 100]             | 8  | sgd   | relu    | 0.6422 | 0.02219 | 450 | 0.9153 | 0.02922 | 388 | 0.5455 | 0.02882 | 386 | 15.75 | 0.5  | 408    | 407 |
| [20]                  | 8  | sgd   | relu    | 0.6394 | 0.02165 | 445 | 0.9157 | 0.03535 | 391 | 0.5448 | 0.03688 | 389 | 13.22 | 0.07 | 408.33 | 408 |
| [80, 40, 60]          | 32 | adam  | sigmoid | 0.625  | 0.01612 | 396 | 0.9222 | 0.03222 | 415 | 0.5379 | 0.03433 | 416 | 7.9   | 0.21 | 409    | 409 |
| [20, 100]             | 8  | Nadam | sigmoid | 0.6213 | 0.01363 | 378 | 0.9248 | 0.03039 | 426 | 0.5352 | 0.03376 | 427 | 17.46 | 0.25 | 410.33 | 410 |
| [20]                  | 32 | Nadam | tanh    | 0.6239 | 0.01234 | 392 | 0.923  | 0.02655 | 421 | 0.5374 | 0.02816 | 420 | 5.31  | 0.15 | 411    | 411 |
| [100, 60, 40]         | 32 | adam  | sigmoid | 0.6277 | 0.01446 | 406 | 0.9222 | 0.02707 | 414 | 0.5379 | 0.03303 | 417 | 9.03  | 0.17 | 412.33 | 412 |
| [20, 100]             | 32 | adam  | tanh    | 0.6289 | 0.00977 | 411 | 0.9219 | 0.02811 | 412 | 0.5382 | 0.02883 | 414 | 5.3   | 0.22 | 412.33 | 413 |
| [80]                  | 16 | sgd   | relu    | 0.6411 | 0.01316 | 446 | 0.9169 | 0.02257 | 398 | 0.5441 | 0.02533 | 393 | 22.21 | 11.1 | 412.33 | 414 |
| [60, 60]              | 16 | sgd   | relu    | 0.6419 | 0.01323 | 449 | 0.9167 | 0.02996 | 396 | 0.5443 | 0.02848 | 392 | 35.68 | 1.3  | 412.33 | 415 |
| [60]                  | 16 | Nadam | sigmoid | 0.6257 | 0.01185 | 398 | 0.9242 | 0.02963 | 424 | 0.5361 | 0.03062 | 424 | 13.37 | 0.11 | 415.33 | 416 |
| [20, 20]              | 16 | adam  | sigmoid | 0.627  | 0.01653 | 404 | 0.9238 | 0.03594 | 422 | 0.5364 | 0.03556 | 423 | 9.29  | 0.27 | 416.33 | 417 |
| [40, 80, 80, 40]      | 32 | Nadam | sigmoid | 0.6287 | 0.01194 | 409 | 0.923  | 0.03019 | 420 | 0.5374 | 0.03308 | 421 | 7.48  | 0.29 | 416.67 | 418 |
| [100, 60]             | 32 | adam  | sigmoid | 0.6262 | 0.01125 | 401 | 0.9244 | 0.02845 | 425 | 0.5357 | 0.03309 | 426 | 8.92  | 0.4  | 417.33 | 419 |
| [40]                  | 16 | adam  | sigmoid | 0.6268 | 0.01009 | 403 | 0.9258 | 0.021   | 429 | 0.5349 | 0.02106 | 428 | 10.33 | 0.39 | 420    | 420 |
| [80, 80]              | 32 | adam  | sigmoid | 0.6277 | 0.01677 | 405 | 0.9265 | 0.028   | 430 | 0.5338 | 0.03214 | 430 | 7.57  | 0.09 | 421.67 | 421 |
| [80, 40, 60]          | 32 | Nadam | sigmoid | 0.6261 | 0.0122  | 399 | 0.9271 | 0.02786 | 433 | 0.533  | 0.0324  | 434 | 9.21  | 0.23 | 422    | 422 |
| [100, 80, 60, 40, 20] | 16 | adam  | sigmoid | 0.6355 | 0.05422 | 439 | 0.9209 | 0.06214 | 410 | 0.5377 | 0.05876 | 418 | 16.14 | 0.27 | 422.33 | 423 |
| [60, 20]              | 16 | sgd   | relu    | 0.6487 | 0.01088 | 461 | 0.9198 | 0.02115 | 403 | 0.5413 | 0.02312 | 403 | 11.05 | 0.14 | 422.33 | 424 |
| [80, 40]              | 32 | adam  | sigmoid | 0.6296 | 0.01363 | 416 | 0.9257 | 0.02846 | 428 | 0.5343 | 0.0338  | 429 | 7.47  | 0.13 | 424.33 | 425 |
| [40, 80]              | 16 | sgd   | relu    | 0.6516 | 0.01583 | 464 | 0.9202 | 0.02547 | 406 | 0.5407 | 0.02148 | 404 | 9.92  | 0.23 | 424.67 | 426 |
| [40]                  | 16 | Nadam | sigmoid | 0.6288 | 0.01353 | 410 | 0.9272 | 0.03076 | 434 | 0.5331 | 0.03216 | 433 | 11.09 | 0.22 | 425.67 | 427 |
| [80, 60, 80, 40]      | 32 | adam  | sigmoid | 0.6296 | 0.01299 | 414 | 0.9266 | 0.0287  | 431 | 0.5333 | 0.03553 | 432 | 8.14  | 0.09 | 425.67 | 428 |
| [40, 60, 80]          | 16 | sgd   | relu    | 0.6499 | 0.01315 | 462 | 0.9211 | 0.02569 | 411 | 0.5402 | 0.01984 | 407 | 10.39 | 0.5  | 426.67 | 429 |

|                       |    |       |         |        |         |     |        |         |     |        |         |     |       |      |        |     |
|-----------------------|----|-------|---------|--------|---------|-----|--------|---------|-----|--------|---------|-----|-------|------|--------|-----|
| [40]                  | 16 | sgd   | relu    | 0.6464 | 0.01167 | 455 | 0.9224 | 0.02112 | 416 | 0.539  | 0.01593 | 411 | 8.58  | 0.15 | 427.33 | 430 |
| [100, 60]             | 32 | Nadam | sigmoid | 0.6282 | 0.01295 | 408 | 0.9285 | 0.02819 | 439 | 0.5318 | 0.03103 | 439 | 10    | 0.26 | 428.67 | 431 |
| [100, 80, 60, 40, 20] | 32 | Nadam | sigmoid | 0.6349 | 0.01876 | 436 | 0.9249 | 0.03436 | 427 | 0.5358 | 0.03523 | 425 | 11    | 0.16 | 429.33 | 432 |
| [20, 100]             | 16 | adam  | sigmoid | 0.63   | 0.01324 | 421 | 0.9278 | 0.02742 | 436 | 0.5327 | 0.02821 | 436 | 9.56  | 0.32 | 431    | 433 |
| [80, 80, 80, 80]      | 32 | Nadam | sigmoid | 0.6318 | 0.01537 | 430 | 0.9269 | 0.03165 | 432 | 0.5334 | 0.03209 | 431 | 9.44  | 0.05 | 431    | 434 |
| [80, 60, 80, 40]      | 16 | sgd   | relu    | 0.6522 | 0.00878 | 466 | 0.9228 | 0.02413 | 419 | 0.5385 | 0.01885 | 412 | 11.52 | 0.06 | 432.33 | 435 |
| [60]                  | 16 | sgd   | relu    | 0.647  | 0.01499 | 456 | 0.9242 | 0.02204 | 423 | 0.5373 | 0.01763 | 422 | 10.05 | 0.15 | 433.67 | 436 |
| [80, 40]              | 32 | Nadam | sigmoid | 0.6296 | 0.01278 | 415 | 0.9304 | 0.03096 | 443 | 0.5299 | 0.03409 | 444 | 8.51  | 0.14 | 434    | 437 |
| [100, 60, 40]         | 32 | Nadam | sigmoid | 0.6311 | 0.01288 | 427 | 0.928  | 0.02683 | 437 | 0.5319 | 0.03428 | 438 | 10.37 | 0.11 | 434    | 438 |
| [60, 40, 20]          | 32 | Nadam | sigmoid | 0.6307 | 0.01597 | 424 | 0.9294 | 0.0333  | 440 | 0.5308 | 0.03523 | 441 | 8.52  | 0.05 | 435    | 439 |
| [20]                  | 16 | Nadam | sigmoid | 0.6331 | 0.01318 | 431 | 0.9281 | 0.02598 | 438 | 0.5324 | 0.02772 | 437 | 9.49  | 0.43 | 435.33 | 440 |
| [60, 20]              | 32 | adam  | sigmoid | 0.6299 | 0.00777 | 420 | 0.9313 | 0.02609 | 445 | 0.5293 | 0.02814 | 446 | 7.09  | 0.07 | 437    | 441 |
| [40, 60, 80]          | 32 | adam  | sigmoid | 0.6308 | 0.01632 | 426 | 0.93   | 0.03626 | 442 | 0.5301 | 0.03826 | 443 | 6.5   | 0.26 | 437    | 442 |
| [40, 40]              | 32 | adam  | sigmoid | 0.6294 | 0.01196 | 412 | 0.932  | 0.02927 | 451 | 0.5285 | 0.03167 | 450 | 6.16  | 0.68 | 437.67 | 443 |
| [60, 60]              | 32 | Nadam | sigmoid | 0.6298 | 0.01182 | 419 | 0.9316 | 0.02826 | 447 | 0.5285 | 0.03368 | 449 | 8.16  | 0.06 | 438.33 | 444 |
| [60, 20]              | 32 | Nadam | sigmoid | 0.6301 | 0.01161 | 422 | 0.9319 | 0.02743 | 450 | 0.5289 | 0.02831 | 447 | 8.21  | 0.09 | 439.67 | 445 |
| [100, 100]            | 32 | Nadam | sigmoid | 0.6302 | 0.01194 | 423 | 0.9318 | 0.02668 | 449 | 0.5282 | 0.03016 | 451 | 10.21 | 0.31 | 441    | 446 |
| [20, 100]             | 16 | Nadam | sigmoid | 0.6296 | 0.01214 | 417 | 0.9347 | 0.02656 | 458 | 0.5258 | 0.02958 | 458 | 10.54 | 0.23 | 444.33 | 447 |
| [20, 20]              | 16 | Nadam | sigmoid | 0.6308 | 0.01332 | 425 | 0.9334 | 0.0282  | 454 | 0.5268 | 0.03066 | 455 | 10.09 | 0.27 | 444.67 | 448 |
| [20]                  | 16 | adam  | sigmoid | 0.636  | 0.01417 | 440 | 0.9316 | 0.03251 | 446 | 0.5289 | 0.03162 | 448 | 8.53  | 0.24 | 444.67 | 449 |
| [80, 80]              | 32 | Nadam | sigmoid | 0.6317 | 0.01072 | 428 | 0.9333 | 0.02772 | 453 | 0.5269 | 0.03086 | 454 | 8.83  | 0.4  | 445    | 450 |
| [60, 60]              | 32 | adam  | sigmoid | 0.6317 | 0.01166 | 429 | 0.934  | 0.02579 | 456 | 0.5264 | 0.02915 | 456 | 7.25  | 0.08 | 447    | 451 |
| [80, 80, 80, 80]      | 16 | sgd   | relu    | 0.6553 | 0.02188 | 472 | 0.9296 | 0.03049 | 441 | 0.531  | 0.03118 | 440 | 11.47 | 0.16 | 451    | 452 |
| [100, 80, 60, 40, 20] | 8  | sgd   | relu    | 0.6613 | 0.02128 | 483 | 0.9277 | 0.02122 | 435 | 0.5329 | 0.02465 | 435 | 24.22 | 0.81 | 451    | 453 |
| [40, 80]              | 32 | adam  | sigmoid | 0.634  | 0.01322 | 434 | 0.9361 | 0.0299  | 461 | 0.524  | 0.03124 | 461 | 5.9   | 0.21 | 452    | 454 |
| [20]                  | 16 | sgd   | relu    | 0.6545 | 0.01511 | 469 | 0.9317 | 0.02547 | 448 | 0.5294 | 0.02582 | 445 | 9.03  | 0.61 | 454    | 455 |
| [80, 80, 40, 40]      | 16 | sgd   | relu    | 0.6597 | 0.01441 | 477 | 0.9307 | 0.02804 | 444 | 0.5305 | 0.02554 | 442 | 11.54 | 0.13 | 454.33 | 456 |
| [40, 40]              | 32 | Nadam | sigmoid | 0.6342 | 0.01103 | 435 | 0.9379 | 0.02735 | 466 | 0.5227 | 0.02811 | 465 | 6.6   | 0.35 | 455.33 | 457 |
| [40, 80]              | 32 | Nadam | sigmoid | 0.6351 | 0.01339 | 437 | 0.9388 | 0.03105 | 468 | 0.5215 | 0.03236 | 469 | 6.64  | 0.04 | 458    | 458 |
| [40, 60, 80]          | 32 | Nadam | sigmoid | 0.6381 | 0.01574 | 444 | 0.9376 | 0.0317  | 464 | 0.5221 | 0.0362  | 467 | 6.94  | 0.15 | 458.33 | 459 |
| [40, 40]              | 16 | sgd   | relu    | 0.6581 | 0.0159  | 474 | 0.9325 | 0.02164 | 452 | 0.5281 | 0.02997 | 452 | 28.08 | 0.66 | 459.33 | 460 |

|                       |    |       |         |        |         |     |        |         |     |        |         |     |        |         |        |     |
|-----------------------|----|-------|---------|--------|---------|-----|--------|---------|-----|--------|---------|-----|--------|---------|--------|-----|
| [20, 100]             | 16 | sgd   | relu    | 0.6577 | 0.01127 | 473 | 0.934  | 0.02153 | 455 | 0.5269 | 0.02476 | 453 | 9.48   | 0.44    | 460.33 | 461 |
| [20, 20]              | 32 | Nadam | sigmoid | 0.6415 | 0.00699 | 447 | 0.9401 | 0.0249  | 471 | 0.5205 | 0.02604 | 470 | 5.65   | 0.14    | 462.67 | 462 |
| [40]                  | 8  | sgd   | tanh    | 0.6583 | 0.00599 | 475 | 0.9372 | 0.01818 | 462 | 0.5235 | 0.01441 | 462 | 50.77  | 2.02    | 466.33 | 463 |
| [40, 80, 80, 40]      | 8  | sgd   | tanh    | 0.6601 | 0.01334 | 480 | 0.9354 | 0.03055 | 460 | 0.5255 | 0.02891 | 459 | 63.8   | 14.27   | 466.33 | 464 |
| [80, 80, 80, 80]      | 8  | sgd   | tanh    | 0.6629 | 0.01359 | 485 | 0.9342 | 0.02808 | 457 | 0.5264 | 0.03097 | 457 | 31.85  | 0.71    | 466.33 | 465 |
| [60, 40, 20]          | 8  | sgd   | tanh    | 0.6607 | 0.02125 | 482 | 0.9351 | 0.02923 | 459 | 0.5249 | 0.03318 | 460 | 291.1  | 543.64  | 467    | 466 |
| [20, 100]             | 32 | adam  | sigmoid | 0.6434 | 0.01445 | 451 | 0.9412 | 0.02931 | 474 | 0.5188 | 0.03452 | 477 | 5.28   | 0.11    | 467.33 | 467 |
| [20]                  | 8  | sgd   | tanh    | 0.6585 | 0.01333 | 476 | 0.9377 | 0.01864 | 465 | 0.5229 | 0.02865 | 464 | 61.09  | 18.33   | 468.33 | 468 |
| [20, 20]              | 8  | sgd   | tanh    | 0.6599 | 0.01479 | 479 | 0.9376 | 0.02526 | 463 | 0.5232 | 0.02801 | 463 | 930.63 | 1764.11 | 468.33 | 469 |
| [100, 100]            | 8  | sgd   | tanh    | 0.6599 | 0.00714 | 478 | 0.938  | 0.02173 | 467 | 0.5224 | 0.02773 | 466 | 21.08  | 0.44    | 470.33 | 470 |
| [20, 100]             | 32 | Nadam | sigmoid | 0.6437 | 0.01142 | 452 | 0.9428 | 0.02663 | 481 | 0.5176 | 0.02949 | 480 | 5.76   | 0.22    | 471    | 471 |
| [20]                  | 32 | adam  | sigmoid | 0.6524 | 0.02212 | 467 | 0.9413 | 0.03752 | 475 | 0.5187 | 0.03919 | 478 | 4.75   | 0.1     | 473.33 | 472 |
| [20, 20]              | 32 | adam  | sigmoid | 0.645  | 0.00822 | 453 | 0.9447 | 0.02191 | 484 | 0.5157 | 0.02532 | 484 | 5.13   | 0.14    | 473.67 | 473 |
| [60]                  | 32 | Nadam | sigmoid | 0.6478 | 0.01149 | 457 | 0.9439 | 0.02744 | 483 | 0.5164 | 0.03065 | 483 | 7.66   | 0.09    | 474.33 | 474 |
| [60, 60]              | 8  | sgd   | tanh    | 0.6603 | 0.00794 | 481 | 0.9404 | 0.0223  | 472 | 0.5202 | 0.02279 | 472 | 18.92  | 0.36    | 475    | 475 |
| [100]                 | 32 | Nadam | sigmoid | 0.6457 | 0.01073 | 454 | 0.9453 | 0.02754 | 485 | 0.515  | 0.03064 | 487 | 9.32   | 0.21    | 475.33 | 476 |
| [100, 80, 60, 40, 20] | 32 | adam  | sigmoid | 0.6525 | 0.07079 | 468 | 0.9416 | 0.07998 | 478 | 0.5174 | 0.07518 | 482 | 9.9    | 0.19    | 476    | 477 |
| [60, 40, 20]          | 16 | sgd   | relu    | 0.6652 | 0.01067 | 487 | 0.9399 | 0.0099  | 470 | 0.5204 | 0.02053 | 471 | 11.17  | 0.32    | 476    | 478 |
| [20, 20]              | 16 | sgd   | relu    | 0.6679 | 0.01372 | 492 | 0.9395 | 0.02658 | 469 | 0.5216 | 0.02029 | 468 | 29.3   | 6.54    | 476.33 | 479 |
| [60]                  | 32 | adam  | sigmoid | 0.6487 | 0.00786 | 460 | 0.9461 | 0.02195 | 488 | 0.5142 | 0.02671 | 488 | 6.75   | 0.08    | 478.67 | 480 |
| [80, 80, 40, 40]      | 8  | sgd   | tanh    | 0.6672 | 0.0182  | 490 | 0.9404 | 0.01822 | 473 | 0.5196 | 0.03312 | 473 | 41.95  | 18.39   | 478.67 | 481 |
| [60]                  | 8  | sgd   | tanh    | 0.6637 | 0.00972 | 486 | 0.9416 | 0.02624 | 477 | 0.519  | 0.02661 | 476 | 63.08  | 9.76    | 479.67 | 482 |
| [80]                  | 32 | adam  | sigmoid | 0.6485 | 0.01057 | 458 | 0.9478 | 0.02644 | 493 | 0.5121 | 0.03219 | 493 | 7.22   | 0.02    | 481.33 | 483 |
| [40, 80, 80, 40]      | 16 | sgd   | relu    | 0.6672 | 0.01557 | 491 | 0.9416 | 0.02389 | 479 | 0.5195 | 0.01943 | 474 | 9.79   | 0.1     | 481.33 | 484 |
| [100, 80, 60, 40, 20] | 8  | sgd   | tanh    | 0.6689 | 0.0158  | 493 | 0.9415 | 0.02264 | 476 | 0.5193 | 0.02244 | 475 | 76.14  | 2.18    | 481.33 | 485 |
| [100, 60]             | 8  | sgd   | tanh    | 0.6628 | 0.01307 | 484 | 0.9436 | 0.02237 | 482 | 0.5176 | 0.01345 | 481 | 20.55  | 0.4     | 482.33 | 486 |
| [20]                  | 32 | Nadam | sigmoid | 0.655  | 0.01823 | 471 | 0.9462 | 0.0325  | 489 | 0.514  | 0.0337  | 490 | 5.23   | 0.07    | 483.33 | 487 |
| [80]                  | 32 | Nadam | sigmoid | 0.6486 | 0.00938 | 459 | 0.9491 | 0.02386 | 496 | 0.5111 | 0.02687 | 496 | 8.05   | 0.09    | 483.67 | 488 |
| [40]                  | 32 | adam  | sigmoid | 0.6519 | 0.0111  | 465 | 0.9483 | 0.02583 | 494 | 0.5117 | 0.028   | 494 | 5.74   | 0.25    | 484.33 | 489 |
| [100]                 | 32 | adam  | sigmoid | 0.6503 | 0.01117 | 463 | 0.9491 | 0.02444 | 495 | 0.5109 | 0.02825 | 497 | 8.52   | 0.27    | 485    | 490 |
| [80, 60, 80, 40]      | 8  | sgd   | tanh    | 0.6714 | 0.0138  | 498 | 0.9428 | 0.02404 | 480 | 0.5177 | 0.03021 | 479 | 32.04  | 0.7     | 485.67 | 491 |

|                  |    |       |         |        |         |     |        |         |     |        |         |     |       |       |        |     |
|------------------|----|-------|---------|--------|---------|-----|--------|---------|-----|--------|---------|-----|-------|-------|--------|-----|
| [100, 100]       | 32 | sgd   | relu    | 0.6664 | 0.00963 | 488 | 0.9455 | 0.01268 | 486 | 0.5155 | 0.01682 | 485 | 7.21  | 0.33  | 486.33 | 492 |
| [40, 80]         | 8  | sgd   | tanh    | 0.6667 | 0.01176 | 489 | 0.9463 | 0.02246 | 490 | 0.5142 | 0.02346 | 489 | 16.6  | 0.67  | 489.33 | 493 |
| [60, 20]         | 8  | sgd   | tanh    | 0.6714 | 0.01434 | 495 | 0.9459 | 0.02888 | 487 | 0.5153 | 0.02236 | 486 | 17.98 | 0.33  | 489.33 | 494 |
| [40]             | 32 | Nadam | sigmoid | 0.6549 | 0.01074 | 470 | 0.9513 | 0.02507 | 500 | 0.5089 | 0.02788 | 500 | 6.19  | 0.25  | 490    | 495 |
| [80, 40, 60]     | 8  | sgd   | tanh    | 0.6714 | 0.01239 | 497 | 0.9467 | 0.01985 | 492 | 0.5139 | 0.02673 | 491 | 61.87 | 10.49 | 493.33 | 496 |
| [40, 60, 80]     | 8  | sgd   | tanh    | 0.6718 | 0.01935 | 499 | 0.9465 | 0.02871 | 491 | 0.5137 | 0.03099 | 492 | 58.47 | 18.66 | 494    | 497 |
| [100]            | 8  | sgd   | tanh    | 0.6714 | 0.00311 | 494 | 0.9513 | 0.01828 | 499 | 0.5093 | 0.02032 | 498 | 78.82 | 1.86  | 497    | 498 |
| [20, 100]        | 8  | sgd   | tanh    | 0.6714 | 0.01479 | 496 | 0.9507 | 0.02733 | 498 | 0.5089 | 0.03776 | 499 | 14.3  | 0.38  | 497.67 | 499 |
| [100, 60]        | 32 | sgd   | relu    | 0.6771 | 0.01206 | 502 | 0.9493 | 0.02624 | 497 | 0.5114 | 0.02889 | 495 | 6.98  | 0.35  | 498    | 500 |
| [80]             | 8  | sgd   | tanh    | 0.6727 | 0.01547 | 500 | 0.9523 | 0.02782 | 502 | 0.5081 | 0.02977 | 502 | 70.37 | 6.13  | 501.33 | 501 |
| [80, 40]         | 32 | sgd   | relu    | 0.6778 | 0.01209 | 503 | 0.9517 | 0.01216 | 501 | 0.5085 | 0.02586 | 501 | 5.96  | 0.09  | 501.67 | 502 |
| [80, 80]         | 8  | sgd   | tanh    | 0.6797 | 0.0148  | 504 | 0.956  | 0.02676 | 504 | 0.5043 | 0.02661 | 504 | 19.22 | 0.36  | 504    | 503 |
| [80, 40]         | 8  | sgd   | tanh    | 0.6821 | 0.01992 | 506 | 0.9553 | 0.02834 | 503 | 0.5052 | 0.02532 | 503 | 19.04 | 0.29  | 504    | 504 |
| [20]             | 16 | sgd   | tanh    | 0.6758 | 0.01093 | 501 | 0.9587 | 0.01661 | 506 | 0.502  | 0.01185 | 506 | 11    | 0.14  | 504.33 | 505 |
| [40, 60, 80]     | 16 | sgd   | tanh    | 0.6825 | 0.01409 | 507 | 0.9574 | 0.0206  | 505 | 0.5034 | 0.00798 | 505 | 29.92 | 2.54  | 505.67 | 506 |
| [40]             | 16 | sgd   | tanh    | 0.6815 | 0.00922 | 505 | 0.9616 | 0.01779 | 509 | 0.4991 | 0.01207 | 508 | 12.6  | 0.63  | 507.33 | 507 |
| [100]            | 32 | sgd   | relu    | 0.6833 | 0.01905 | 508 | 0.96   | 0.03058 | 507 | 0.5005 | 0.02579 | 507 | 7.04  | 0.12  | 507.33 | 508 |
| [80]             | 32 | sgd   | relu    | 0.6849 | 0.0134  | 511 | 0.9616 | 0.02054 | 508 | 0.4989 | 0.02228 | 509 | 5.99  | 0.05  | 509.33 | 509 |
| [40, 40]         | 8  | sgd   | tanh    | 0.6833 | 0.02143 | 509 | 0.9616 | 0.02928 | 510 | 0.4976 | 0.03604 | 512 | 16.44 | 0.61  | 510.33 | 510 |
| [100, 60, 40]    | 16 | sgd   | tanh    | 0.6868 | 0.01318 | 514 | 0.9625 | 0.01903 | 512 | 0.4979 | 0.02209 | 511 | 57.25 | 12.89 | 512.33 | 511 |
| [40]             | 32 | sgd   | relu    | 0.6874 | 0.01209 | 516 | 0.9623 | 0.01774 | 511 | 0.498  | 0.02049 | 510 | 4.64  | 0.02  | 512.33 | 512 |
| [80, 40]         | 16 | sgd   | tanh    | 0.6838 | 0.00641 | 510 | 0.9628 | 0.01786 | 514 | 0.4974 | 0.0185  | 514 | 41.51 | 1.25  | 512.67 | 513 |
| [20, 100]        | 16 | sgd   | tanh    | 0.6871 | 0.00931 | 515 | 0.9626 | 0.01706 | 513 | 0.4974 | 0.02408 | 513 | 42.38 | 3.25  | 513.67 | 514 |
| [60]             | 32 | sgd   | relu    | 0.6875 | 0.009   | 517 | 0.9631 | 0.017   | 515 | 0.4974 | 0.0174  | 515 | 5.63  | 0.17  | 515.67 | 515 |
| [40, 80]         | 16 | sgd   | tanh    | 0.6864 | 0.01116 | 513 | 0.9654 | 0.01779 | 519 | 0.4945 | 0.0217  | 518 | 37.43 | 8.84  | 516.67 | 516 |
| [60]             | 16 | sgd   | tanh    | 0.6851 | 0.01528 | 512 | 0.9661 | 0.0196  | 521 | 0.4942 | 0.01594 | 520 | 11.35 | 0.49  | 517.67 | 517 |
| [40, 40]         | 16 | sgd   | tanh    | 0.6894 | 0.01054 | 519 | 0.965  | 0.02311 | 517 | 0.495  | 0.02255 | 517 | 28.4  | 0.83  | 517.67 | 518 |
| [40, 80, 80, 40] | 16 | sgd   | tanh    | 0.6918 | 0.01437 | 526 | 0.9643 | 0.01945 | 516 | 0.4953 | 0.02765 | 516 | 33.84 | 0.48  | 519.33 | 519 |
| [60, 20]         | 16 | sgd   | tanh    | 0.6904 | 0.00624 | 522 | 0.9658 | 0.01084 | 520 | 0.4943 | 0.01721 | 519 | 34.85 | 1.04  | 520.33 | 520 |
| [80, 80]         | 16 | sgd   | tanh    | 0.6881 | 0.01604 | 518 | 0.9687 | 0.02254 | 523 | 0.4914 | 0.0221  | 523 | 43.32 | 8.99  | 521.33 | 521 |
| [100, 60, 40]    | 8  | sgd   | tanh    | 0.695  | 0.05917 | 530 | 0.9651 | 0.05424 | 518 | 0.4914 | 0.07391 | 522 | 79.21 | 4.94  | 523.33 | 522 |



|                       |    |     |      |        |         |     |        |         |     |        |         |     |       |       |        |     |
|-----------------------|----|-----|------|--------|---------|-----|--------|---------|-----|--------|---------|-----|-------|-------|--------|-----|
| [20, 20]              | 16 | sgd | tanh | 0.69   | 0.01431 | 521 | 0.9694 | 0.01316 | 525 | 0.49   | 0.0275  | 525 | 26.06 | 0.31  | 523.67 | 523 |
| [60, 40, 20]          | 16 | sgd | tanh | 0.691  | 0.00957 | 523 | 0.9694 | 0.01874 | 524 | 0.4906 | 0.0214  | 524 | 37.23 | 0.92  | 523.67 | 524 |
| [100, 60]             | 16 | sgd | tanh | 0.6898 | 0.00715 | 520 | 0.9714 | 0.01829 | 527 | 0.4886 | 0.01797 | 526 | 62.2  | 16.73 | 524.33 | 525 |
| [60, 20]              | 32 | sgd | relu | 0.697  | 0.03012 | 531 | 0.967  | 0.0261  | 522 | 0.4938 | 0.01067 | 521 | 5.78  | 0.05  | 524.67 | 526 |
| [80, 60, 80, 40]      | 16 | sgd | tanh | 0.6917 | 0.00628 | 524 | 0.9713 | 0.01196 | 526 | 0.4885 | 0.01989 | 527 | 45.6  | 0.99  | 525.67 | 527 |
| [80, 80, 80, 80]      | 16 | sgd | tanh | 0.6931 | 0.01486 | 527 | 0.9718 | 0.02123 | 528 | 0.4882 | 0.02346 | 528 | 53.18 | 14.85 | 527.67 | 528 |
| [100, 100]            | 16 | sgd | tanh | 0.6946 | 0.00712 | 529 | 0.9725 | 0.01203 | 530 | 0.4874 | 0.0154  | 529 | 52.52 | 4.08  | 529.33 | 529 |
| [80]                  | 16 | sgd | tanh | 0.6932 | 0.01218 | 528 | 0.9729 | 0.0182  | 531 | 0.4871 | 0.01955 | 531 | 11.28 | 0.16  | 530    | 530 |
| [100]                 | 16 | sgd | tanh | 0.6917 | 0.01112 | 525 | 0.9753 | 0.0183  | 534 | 0.4845 | 0.017   | 533 | 17.32 | 9.06  | 530.67 | 531 |
| [80, 80]              | 32 | sgd | relu | 0.7052 | 0.03882 | 536 | 0.9724 | 0.0365  | 529 | 0.4873 | 0.0339  | 530 | 5.94  | 0.14  | 531.67 | 532 |
| [60, 60]              | 32 | sgd | relu | 0.6995 | 0.01372 | 533 | 0.9743 | 0.01616 | 532 | 0.4852 | 0.0264  | 532 | 5.84  | 0.09  | 532.33 | 533 |
| [60, 60]              | 16 | sgd | tanh | 0.6983 | 0.01946 | 532 | 0.9752 | 0.01872 | 533 | 0.4842 | 0.02605 | 535 | 47.43 | 2.79  | 533.33 | 534 |
| [80, 80, 40, 40]      | 16 | sgd | tanh | 0.7003 | 0.00858 | 534 | 0.9754 | 0.01987 | 535 | 0.4842 | 0.01988 | 534 | 45.38 | 1.48  | 534.33 | 535 |
| [20]                  | 32 | sgd | relu | 0.7059 | 0.01671 | 537 | 0.9827 | 0.0264  | 537 | 0.4771 | 0.01477 | 537 | 4.29  | 0.05  | 537    | 536 |
| [20, 20]              | 32 | sgd | relu | 0.7041 | 0.01386 | 535 | 0.9847 | 0.01911 | 539 | 0.4745 | 0.02355 | 539 | 4.69  | 0.15  | 537.67 | 537 |
| [40, 40]              | 32 | sgd | relu | 0.709  | 0.03003 | 541 | 0.9794 | 0.03178 | 536 | 0.4798 | 0.03087 | 536 | 4.91  | 0.03  | 537.67 | 538 |
| [80, 40, 60]          | 16 | sgd | tanh | 0.7065 | 0.01344 | 538 | 0.9832 | 0.02093 | 538 | 0.4752 | 0.02873 | 538 | 44.42 | 0.72  | 538    | 539 |
| [20, 100]             | 32 | sgd | relu | 0.7078 | 0.01284 | 539 | 0.9856 | 0.02303 | 540 | 0.4738 | 0.02107 | 540 | 4.85  | 0.2   | 539.67 | 540 |
| [100, 80, 60, 40, 20] | 16 | sgd | tanh | 0.7079 | 0.01144 | 540 | 0.9878 | 0.02109 | 542 | 0.4709 | 0.0257  | 542 | 56.49 | 0.32  | 541.33 | 541 |
| [40, 80]              | 32 | sgd | relu | 0.712  | 0.03643 | 542 | 0.9865 | 0.04164 | 541 | 0.472  | 0.04522 | 541 | 4.97  | 0.12  | 541.33 | 542 |
| [100, 60, 40]         | 32 | sgd | relu | 0.7168 | 0.03612 | 543 | 0.9891 | 0.04499 | 543 | 0.4695 | 0.04309 | 543 | 7.25  | 0.47  | 543    | 543 |
| [40, 40]              | 32 | sgd | tanh | 0.7175 | 0.01684 | 544 | 0.9958 | 0.02547 | 544 | 0.4629 | 0.02049 | 544 | 18.04 | 0.11  | 544    | 544 |
| [20]                  | 32 | sgd | tanh | 0.7195 | 0.00939 | 545 | 0.9971 | 0.01514 | 546 | 0.4615 | 0.01231 | 545 | 15.1  | 0.12  | 545.33 | 545 |
| [60]                  | 32 | sgd | tanh | 0.7199 | 0.0128  | 546 | 0.997  | 0.01507 | 545 | 0.4613 | 0.01879 | 546 | 22.13 | 1.56  | 545.67 | 546 |
| [40]                  | 32 | sgd | tanh | 0.7221 | 0.01125 | 548 | 0.9981 | 0.01484 | 547 | 0.4603 | 0.01285 | 547 | 16.91 | 0.04  | 547.33 | 547 |
| [100, 60]             | 32 | sgd | tanh | 0.7223 | 0.01173 | 549 | 0.9985 | 0.01269 | 548 | 0.46   | 0.00916 | 548 | 30.21 | 0.15  | 548.33 | 548 |
| [80, 40]              | 32 | sgd | tanh | 0.7216 | 0.01413 | 547 | 1.0007 | 0.01706 | 550 | 0.4573 | 0.02034 | 550 | 26.01 | 0.11  | 549    | 549 |
| [80]                  | 32 | sgd | tanh | 0.726  | 0.01325 | 552 | 1.0001 | 0.0183  | 549 | 0.4582 | 0.01349 | 549 | 24.99 | 0.08  | 550    | 550 |
| [100]                 | 32 | sgd | tanh | 0.7233 | 0.01089 | 551 | 1.001  | 0.01977 | 551 | 0.4572 | 0.01583 | 551 | 29.03 | 0.21  | 551    | 551 |
| [60, 60]              | 32 | sgd | tanh | 0.7229 | 0.02288 | 550 | 1.0011 | 0.02553 | 552 | 0.4566 | 0.02447 | 552 | 23.94 | 0.08  | 551.33 | 552 |
| [100, 100]            | 32 | sgd | tanh | 0.7293 | 0.01098 | 553 | 1.0043 | 0.01547 | 554 | 0.4531 | 0.02943 | 555 | 30.44 | 0.73  | 554    | 553 |

|                       |    |     |         |        |         |     |        |         |     |        |         |     |       |      |        |     |
|-----------------------|----|-----|---------|--------|---------|-----|--------|---------|-----|--------|---------|-----|-------|------|--------|-----|
| [80, 40, 60]          | 32 | sgd | relu    | 0.7324 | 0.02976 | 558 | 1.0019 | 0.0309  | 553 | 0.4558 | 0.02573 | 553 | 7.33  | 0.66 | 554.67 | 554 |
| [20]                  | 8  | sgd | sigmoid | 0.7315 | 0.01352 | 557 | 1.0046 | 0.01581 | 555 | 0.4533 | 0.01608 | 554 | 13.32 | 0.21 | 555.33 | 555 |
| [60, 40, 20]          | 32 | sgd | tanh    | 0.7315 | 0.0182  | 556 | 1.0066 | 0.01968 | 557 | 0.4511 | 0.01626 | 557 | 28.29 | 6.77 | 556.67 | 556 |
| [80, 80, 40, 40]      | 32 | sgd | tanh    | 0.7338 | 0.02935 | 559 | 1.005  | 0.03021 | 556 | 0.453  | 0.01853 | 556 | 33.71 | 6.71 | 557    | 557 |
| [60, 20]              | 32 | sgd | tanh    | 0.7359 | 0.01096 | 561 | 1.0099 | 0.00911 | 558 | 0.4474 | 0.01484 | 558 | 23.91 | 0.2  | 559    | 558 |
| [40, 80]              | 32 | sgd | tanh    | 0.7313 | 0.01976 | 555 | 1.0112 | 0.02286 | 563 | 0.4461 | 0.01791 | 563 | 18.32 | 0.22 | 560.33 | 559 |
| [80, 80]              | 32 | sgd | tanh    | 0.7361 | 0.01891 | 562 | 1.01   | 0.01601 | 560 | 0.4474 | 0.00767 | 559 | 26.08 | 0.14 | 560.33 | 560 |
| [80]                  | 8  | sgd | sigmoid | 0.7378 | 0.01205 | 564 | 1.01   | 0.01354 | 559 | 0.4472 | 0.01903 | 560 | 18.63 | 0.63 | 561    | 561 |
| [60]                  | 8  | sgd | sigmoid | 0.7376 | 0.01208 | 563 | 1.0105 | 0.01406 | 561 | 0.4467 | 0.01575 | 561 | 18.34 | 0.18 | 561.67 | 562 |
| [20, 20]              | 32 | sgd | tanh    | 0.7307 | 0.01703 | 554 | 1.0147 | 0.0185  | 567 | 0.442  | 0.0261  | 567 | 15.92 | 0.38 | 562.67 | 563 |
| [80, 80, 80, 80]      | 32 | sgd | tanh    | 0.7344 | 0.0274  | 560 | 1.0113 | 0.02507 | 564 | 0.4452 | 0.03651 | 564 | 31.29 | 5.33 | 562.67 | 564 |
| [100]                 | 8  | sgd | sigmoid | 0.7404 | 0.01534 | 566 | 1.0107 | 0.0158  | 562 | 0.4465 | 0.01861 | 562 | 20.24 | 0.41 | 563.33 | 565 |
| [40, 60, 80]          | 32 | sgd | relu    | 0.7382 | 0.03751 | 565 | 1.0116 | 0.03947 | 565 | 0.4451 | 0.03881 | 565 | 5.18  | 0.06 | 565    | 566 |
| [40]                  | 8  | sgd | sigmoid | 0.7419 | 0.0084  | 567 | 1.0133 | 0.01357 | 566 | 0.4438 | 0.01186 | 566 | 15.85 | 0.16 | 566.33 | 567 |
| [100, 60, 40]         | 32 | sgd | tanh    | 0.7528 | 0.02614 | 570 | 1.0219 | 0.02291 | 568 | 0.4338 | 0.02956 | 568 | 30.28 | 1.57 | 568.67 | 568 |
| [20, 100]             | 32 | sgd | tanh    | 0.7497 | 0.04192 | 569 | 1.0228 | 0.04393 | 569 | 0.433  | 0.04156 | 569 | 16.21 | 0.92 | 569    | 569 |
| [80, 60, 80, 40]      | 32 | sgd | tanh    | 0.7491 | 0.02883 | 568 | 1.0236 | 0.02995 | 571 | 0.4313 | 0.04312 | 571 | 28.65 | 0.16 | 570    | 570 |
| [100, 80, 60, 40, 20] | 32 | sgd | tanh    | 0.7548 | 0.01311 | 571 | 1.0233 | 0.00847 | 570 | 0.4326 | 0.01536 | 570 | 33.15 | 0.95 | 570.33 | 571 |
| [40, 60, 80]          | 32 | sgd | tanh    | 0.7565 | 0.03157 | 572 | 1.0269 | 0.02719 | 572 | 0.4285 | 0.02413 | 572 | 19.94 | 0.74 | 572    | 572 |
| [40, 80, 80, 40]      | 32 | sgd | tanh    | 0.7613 | 0.03424 | 573 | 1.0346 | 0.034   | 573 | 0.4203 | 0.02662 | 573 | 20.16 | 0.07 | 573    | 573 |
| [80, 40, 60]          | 32 | sgd | tanh    | 0.7674 | 0.04056 | 575 | 1.0348 | 0.03625 | 574 | 0.4188 | 0.04557 | 574 | 27.08 | 0.12 | 574.33 | 574 |
| [80, 80, 80, 80]      | 32 | sgd | relu    | 0.7666 | 0.04024 | 574 | 1.0406 | 0.04724 | 576 | 0.4138 | 0.03224 | 575 | 6.77  | 0.45 | 575    | 575 |
| [60, 40, 20]          | 32 | sgd | relu    | 0.7729 | 0.04806 | 576 | 1.0394 | 0.04855 | 575 | 0.4136 | 0.05119 | 576 | 6.24  | 0.36 | 575.67 | 576 |
| [40]                  | 16 | sgd | sigmoid | 0.7973 | 0.01857 | 578 | 1.0629 | 0.02525 | 577 | 0.3881 | 0.01904 | 577 | 8.37  | 0.18 | 577.33 | 577 |
| [100]                 | 16 | sgd | sigmoid | 0.7971 | 0.01717 | 577 | 1.063  | 0.0236  | 578 | 0.3881 | 0.01593 | 578 | 11.03 | 0.15 | 577.67 | 578 |
| [60]                  | 16 | sgd | sigmoid | 0.7996 | 0.01653 | 579 | 1.0676 | 0.02409 | 579 | 0.3827 | 0.01976 | 579 | 9.59  | 0.07 | 579    | 579 |
| [80]                  | 16 | sgd | sigmoid | 0.8013 | 0.02273 | 580 | 1.068  | 0.02763 | 581 | 0.3822 | 0.02025 | 581 | 10.04 | 0.24 | 580.67 | 580 |
| [100, 100]            | 8  | sgd | sigmoid | 0.806  | 0.02367 | 582 | 1.068  | 0.03112 | 580 | 0.3822 | 0.024   | 580 | 21.01 | 0.29 | 580.67 | 581 |
| [20]                  | 16 | sgd | sigmoid | 0.8054 | 0.0209  | 581 | 1.0732 | 0.02776 | 582 | 0.3761 | 0.02173 | 582 | 7.54  | 0.06 | 581.67 | 582 |
| [100, 60]             | 8  | sgd | sigmoid | 0.8119 | 0.01754 | 583 | 1.0785 | 0.02586 | 583 | 0.3697 | 0.01916 | 583 | 21.09 | 0.37 | 583    | 583 |
| [80, 80]              | 8  | sgd | sigmoid | 0.8162 | 0.02032 | 584 | 1.0819 | 0.02798 | 584 | 0.3658 | 0.02715 | 584 | 19.65 | 0.46 | 584    | 584 |

|                       |    |     |         |        |         |     |        |         |     |        |         |     |       |      |        |     |
|-----------------------|----|-----|---------|--------|---------|-----|--------|---------|-----|--------|---------|-----|-------|------|--------|-----|
| [80, 40]              | 8  | sgd | sigmoid | 0.822  | 0.02158 | 585 | 1.085  | 0.02989 | 585 | 0.3625 | 0.02148 | 585 | 19.78 | 0.31 | 585    | 585 |
| [60, 20]              | 8  | sgd | sigmoid | 0.826  | 0.01716 | 586 | 1.0912 | 0.02517 | 586 | 0.355  | 0.02248 | 586 | 18.75 | 0.76 | 586    | 586 |
| [40, 80]              | 8  | sgd | sigmoid | 0.8359 | 0.01798 | 587 | 1.1008 | 0.02519 | 587 | 0.3438 | 0.01577 | 587 | 16.79 | 0.51 | 587    | 587 |
| [60, 60]              | 8  | sgd | sigmoid | 0.84   | 0.00764 | 589 | 1.106  | 0.01054 | 588 | 0.3366 | 0.02794 | 588 | 19.17 | 0.85 | 588.33 | 588 |
| [100, 80, 60, 40, 20] | 16 | sgd | relu    | 0.8394 | 0.07138 | 588 | 1.1163 | 0.0878  | 590 | 0.3166 | 0.10966 | 591 | 12.87 | 0.22 | 589.67 | 589 |
| [40, 40]              | 8  | sgd | sigmoid | 0.8441 | 0.029   | 591 | 1.1082 | 0.03361 | 589 | 0.3351 | 0.01884 | 589 | 16.57 | 0.52 | 589.67 | 590 |
| [80, 60, 80, 40]      | 32 | sgd | relu    | 0.8408 | 0.05357 | 590 | 1.1189 | 0.06249 | 591 | 0.3181 | 0.08655 | 590 | 7     | 0.85 | 590.33 | 591 |
| [40, 80, 80, 40]      | 32 | sgd | relu    | 0.8782 | 0.05717 | 592 | 1.1587 | 0.07077 | 592 | 0.27   | 0.07479 | 595 | 5.49  | 0.04 | 593    | 592 |
| [20, 100]             | 8  | sgd | sigmoid | 0.8863 | 0.02304 | 595 | 1.1589 | 0.02946 | 593 | 0.273  | 0.01927 | 592 | 14.39 | 0.13 | 593.33 | 593 |
| [40]                  | 32 | sgd | sigmoid | 0.8854 | 0.02531 | 594 | 1.1594 | 0.03134 | 594 | 0.2722 | 0.01815 | 593 | 18.39 | 0.46 | 593.67 | 594 |
| [100]                 | 32 | sgd | sigmoid | 0.8837 | 0.0272  | 593 | 1.1602 | 0.03311 | 595 | 0.2714 | 0.01815 | 594 | 27.73 | 5.73 | 594    | 595 |
| [80]                  | 32 | sgd | sigmoid | 0.887  | 0.0268  | 596 | 1.1638 | 0.03316 | 596 | 0.2669 | 0.01606 | 596 | 21.43 | 4.56 | 596    | 596 |
| [60]                  | 32 | sgd | sigmoid | 0.8883 | 0.02248 | 597 | 1.1655 | 0.02863 | 597 | 0.2646 | 0.01457 | 597 | 25.13 | 1.4  | 597    | 597 |
| [20]                  | 32 | sgd | sigmoid | 0.9045 | 0.02567 | 598 | 1.1825 | 0.03014 | 598 | 0.2429 | 0.01446 | 598 | 15.05 | 0.74 | 598    | 598 |
| [20, 20]              | 8  | sgd | sigmoid | 0.911  | 0.0526  | 599 | 1.1853 | 0.06134 | 599 | 0.2389 | 0.05232 | 599 | 13.7  | 0.11 | 599    | 599 |
| [80, 80, 40, 40]      | 32 | sgd | relu    | 0.9265 | 0.07886 | 600 | 1.2133 | 0.08785 | 600 | 0.1973 | 0.11873 | 600 | 6.66  | 0.12 | 600    | 600 |
| [100, 100]            | 16 | sgd | sigmoid | 0.9866 | 0.02221 | 601 | 1.2738 | 0.02212 | 601 | 0.1214 | 0.01159 | 601 | 11.4  | 0.19 | 601    | 601 |
| [100, 60]             | 16 | sgd | sigmoid | 0.9881 | 0.02257 | 602 | 1.2749 | 0.0197  | 602 | 0.1197 | 0.01581 | 602 | 11.79 | 0.44 | 602    | 602 |
| [80, 80]              | 16 | sgd | sigmoid | 1.0015 | 0.02788 | 603 | 1.2906 | 0.02633 | 603 | 0.0983 | 0.01124 | 603 | 10.45 | 0.23 | 603    | 603 |
| [80, 40]              | 16 | sgd | sigmoid | 1.0085 | 0.02514 | 604 | 1.3008 | 0.02691 | 604 | 0.0839 | 0.01962 | 604 | 10.68 | 0.29 | 604    | 604 |
| [60, 20]              | 16 | sgd | sigmoid | 1.0148 | 0.03772 | 605 | 1.303  | 0.04004 | 605 | 0.0807 | 0.03038 | 605 | 10.09 | 0.24 | 605    | 605 |
| [60, 60]              | 16 | sgd | sigmoid | 1.0203 | 0.0326  | 606 | 1.3129 | 0.03129 | 606 | 0.0669 | 0.00974 | 606 | 10.01 | 0.26 | 606    | 606 |
| [40, 80]              | 16 | sgd | sigmoid | 1.0253 | 0.03064 | 607 | 1.318  | 0.03049 | 607 | 0.0597 | 0.00756 | 607 | 8.87  | 0.24 | 607    | 607 |
| [40, 40]              | 16 | sgd | sigmoid | 1.0349 | 0.02732 | 608 | 1.3282 | 0.02626 | 608 | 0.045  | 0.0105  | 608 | 8.58  | 0.17 | 608    | 608 |
| [20, 100]             | 16 | sgd | sigmoid | 1.0448 | 0.02882 | 609 | 1.3398 | 0.02865 | 609 | 0.0282 | 0.00865 | 609 | 8.22  | 0.18 | 609    | 609 |
| [20, 20]              | 16 | sgd | sigmoid | 1.0474 | 0.02685 | 610 | 1.3417 | 0.02561 | 610 | 0.0255 | 0.00855 | 610 | 8.29  | 0.05 | 610    | 610 |
| [100, 60]             | 32 | sgd | sigmoid | 1.0479 | 0.02782 | 611 | 1.3422 | 0.02819 | 611 | 0.0248 | 0.00567 | 611 | 27.26 | 1.01 | 611    | 611 |
| [100, 100]            | 32 | sgd | sigmoid | 1.0494 | 0.02905 | 612 | 1.3446 | 0.02758 | 612 | 0.0213 | 0.00684 | 612 | 29.06 | 1.64 | 612    | 612 |
| [80, 40]              | 32 | sgd | sigmoid | 1.0533 | 0.02763 | 613 | 1.3477 | 0.02641 | 613 | 0.0168 | 0.00176 | 613 | 22.51 | 8.12 | 613    | 613 |
| [60, 60]              | 32 | sgd | sigmoid | 1.0553 | 0.02936 | 616 | 1.3496 | 0.02786 | 614 | 0.0141 | 0.00328 | 614 | 29.06 | 6.38 | 614.67 | 614 |
| [60, 20]              | 32 | sgd | sigmoid | 1.0547 | 0.02846 | 615 | 1.3497 | 0.0274  | 615 | 0.0138 | 0.00258 | 615 | 23.22 | 0.52 | 615    | 615 |

|                       |    |     |         |        |         |     |        |         |     |         |         |     |       |      |        |     |
|-----------------------|----|-----|---------|--------|---------|-----|--------|---------|-----|---------|---------|-----|-------|------|--------|-----|
| [80, 80]              | 32 | sgd | sigmoid | 1.0546 | 0.02793 | 614 | 1.3498 | 0.02606 | 616 | 0.0135  | 0.00227 | 616 | 22.07 | 6.96 | 615.33 | 616 |
| [40, 80]              | 32 | sgd | sigmoid | 1.0592 | 0.02961 | 617 | 1.3551 | 0.02882 | 617 | 0.0059  | 0.00465 | 617 | 17.58 | 0.79 | 617    | 617 |
| [40, 40]              | 32 | sgd | sigmoid | 1.0606 | 0.02723 | 619 | 1.3562 | 0.027   | 618 | 0.0043  | 0.00403 | 618 | 18.88 | 0.13 | 618.33 | 618 |
| [100, 80, 60, 40, 20] | 32 | sgd | relu    | 1.0597 | 0.0325  | 618 | 1.3563 | 0.02975 | 619 | 0.0043  | 0.00528 | 619 | 7.82  | 0.32 | 618.67 | 619 |
| [20, 20]              | 32 | sgd | sigmoid | 1.063  | 0.02779 | 620 | 1.3591 | 0.02603 | 620 | 0       | 0.00334 | 620 | 19.16 | 2.56 | 620    | 620 |
| [20, 100]             | 32 | sgd | sigmoid | 1.0643 | 0.02486 | 621 | 1.3602 | 0.02343 | 621 | -0.0016 | 0.00873 | 621 | 16.08 | 0.53 | 621    | 621 |
| [40, 60, 80]          | 32 | sgd | sigmoid | 1.0661 | 0.02833 | 625 | 1.3612 | 0.02628 | 623 | -0.0029 | 0.0021  | 622 | 21.62 | 0.7  | 623.33 | 622 |
| [100, 60, 40]         | 32 | sgd | sigmoid | 1.0664 | 0.02907 | 629 | 1.3612 | 0.02683 | 622 | -0.0029 | 0.00064 | 623 | 28.33 | 1.32 | 624.67 | 623 |
| [60, 40, 20]          | 32 | sgd | sigmoid | 1.0663 | 0.02797 | 628 | 1.3621 | 0.0268  | 624 | -0.0044 | 0.00218 | 624 | 26.57 | 0.86 | 625.33 | 624 |
| [40, 80, 80, 40]      | 32 | sgd | sigmoid | 1.0657 | 0.02857 | 622 | 1.3626 | 0.02768 | 628 | -0.005  | 0.003   | 628 | 23.67 | 1.63 | 626    | 625 |
| [80, 80, 80, 80]      | 16 | sgd | sigmoid | 1.0662 | 0.02883 | 626 | 1.3625 | 0.0268  | 627 | -0.0048 | 0.00236 | 626 | 46.79 | 0.91 | 626.33 | 626 |
| [60, 40, 20]          | 16 | sgd | sigmoid | 1.0659 | 0.0289  | 623 | 1.3626 | 0.02766 | 629 | -0.0051 | 0.00275 | 629 | 10.63 | 0.41 | 627    | 627 |
| [80, 80, 40, 40]      | 32 | sgd | sigmoid | 1.0668 | 0.02811 | 634 | 1.3625 | 0.02679 | 625 | -0.0048 | 0.0017  | 625 | 28.09 | 0.57 | 628    | 628 |
| [80, 80, 40, 40]      | 16 | sgd | sigmoid | 1.0668 | 0.0274  | 633 | 1.3625 | 0.02621 | 626 | -0.0049 | 0.00334 | 627 | 46.5  | 0.79 | 628.67 | 629 |
| [80, 40, 60]          | 32 | sgd | sigmoid | 1.0663 | 0.02814 | 627 | 1.3629 | 0.02486 | 632 | -0.0055 | 0.00358 | 632 | 26.09 | 0.85 | 630.33 | 630 |
| [60, 40, 20]          | 8  | sgd | sigmoid | 1.0661 | 0.0291  | 624 | 1.3632 | 0.02815 | 635 | -0.0059 | 0.00267 | 635 | 18.81 | 0.6  | 631.33 | 631 |
| [100, 80, 60, 40, 20] | 32 | sgd | sigmoid | 1.0666 | 0.02773 | 632 | 1.3629 | 0.02573 | 631 | -0.0055 | 0.0031  | 631 | 32.87 | 1.19 | 631.33 | 632 |
| [80, 80, 80, 80]      | 32 | sgd | sigmoid | 1.0665 | 0.02815 | 630 | 1.3634 | 0.02702 | 637 | -0.0063 | 0.00493 | 638 | 27.67 | 0.39 | 635    | 633 |
| [100, 80, 60, 40, 20] | 16 | sgd | sigmoid | 1.068  | 0.02598 | 639 | 1.3629 | 0.02444 | 633 | -0.0056 | 0.00526 | 633 | 56.78 | 3.37 | 635    | 634 |
| [80, 60, 80, 40]      | 16 | sgd | sigmoid | 1.0666 | 0.02799 | 631 | 1.3635 | 0.02727 | 638 | -0.0063 | 0.00346 | 637 | 46.98 | 2.07 | 635.33 | 635 |
| [80, 40, 60]          | 16 | sgd | sigmoid | 1.0676 | 0.02926 | 638 | 1.3631 | 0.02895 | 634 | -0.0058 | 0.00616 | 634 | 43.89 | 3.28 | 635.33 | 636 |
| [40, 60, 80]          | 8  | sgd | sigmoid | 1.0693 | 0.02636 | 646 | 1.3627 | 0.02408 | 630 | -0.0053 | 0.00702 | 630 | 17.12 | 0.79 | 635.33 | 637 |
| [40, 80, 80, 40]      | 16 | sgd | sigmoid | 1.0681 | 0.02843 | 641 | 1.3634 | 0.02638 | 636 | -0.0063 | 0.00119 | 636 | 33.57 | 0.1  | 637.67 | 638 |
| [100, 60, 40]         | 8  | sgd | sigmoid | 1.0669 | 0.02951 | 635 | 1.3636 | 0.02884 | 640 | -0.0065 | 0.00624 | 640 | 22.02 | 0.21 | 638.33 | 639 |
| [100, 80, 60, 40, 20] | 8  | sgd | sigmoid | 1.0681 | 0.02743 | 640 | 1.3635 | 0.02784 | 639 | -0.0064 | 0.00519 | 639 | 22.78 | 0.84 | 639.33 | 640 |
| [100, 60, 40]         | 16 | sgd | sigmoid | 1.0674 | 0.0277  | 637 | 1.3641 | 0.02653 | 641 | -0.0073 | 0.00495 | 641 | 16.93 | 9.42 | 639.67 | 641 |
| [80, 60, 80, 40]      | 8  | sgd | sigmoid | 1.067  | 0.02931 | 636 | 1.3653 | 0.02938 | 646 | -0.009  | 0.00673 | 645 | 21.16 | 0.93 | 642.33 | 642 |
| [80, 80, 40, 40]      | 8  | sgd | sigmoid | 1.0685 | 0.02931 | 642 | 1.3645 | 0.02723 | 643 | -0.0079 | 0.00614 | 643 | 20.79 | 0.69 | 642.67 | 643 |
| [80, 60, 80, 40]      | 32 | sgd | sigmoid | 1.0687 | 0.02684 | 644 | 1.3642 | 0.02513 | 642 | -0.0075 | 0.00669 | 642 | 29.46 | 1.4  | 642.67 | 644 |
| [40, 80, 80, 40]      | 8  | sgd | sigmoid | 1.0685 | 0.02934 | 643 | 1.3652 | 0.02917 | 645 | -0.009  | 0.00525 | 644 | 17.4  | 0.51 | 644    | 645 |
| [80, 40, 60]          | 8  | sgd | sigmoid | 1.07   | 0.02553 | 647 | 1.3652 | 0.02041 | 644 | -0.0091 | 0.0109  | 646 | 20.55 | 0.21 | 645.67 | 646 |

|                  |    |     |         |        |         |     |        |         |     |         |         |     |      |      |        |     |
|------------------|----|-----|---------|--------|---------|-----|--------|---------|-----|---------|---------|-----|------|------|--------|-----|
| [40, 60, 80]     | 16 | sgd | sigmoid | 1.0691 | 0.02605 | 645 | 1.3662 | 0.02485 | 647 | -0.0105 | 0.00703 | 647 | 9.41 | 0.22 | 646.33 | 647 |
| [80, 80, 80, 80] | 8  | sgd | sigmoid | 1.0717 | 0.02184 | 648 | 1.3689 | 0.01625 | 648 | -0.0148 | 0.0174  | 648 | 20.4 | 0.79 | 648    | 648 |
